# Supplementary material for: Experimental and Computational Studies on the Interaction of DNA with Hesperetin Schiff Base CuII Complexes
Source: MDPI journal article supplement (doi:10.3390/ijms25105283), 2024-05-13
Supplement: s1 [file s1]

**Section S1.  $[\text{Cu}(\text{L}^1\text{H}_2)(\text{AcO})]_{\text{aq}} + (\text{H}_2\text{O})_{8\text{ aq}} \rightleftharpoons [\text{Cu}(\text{L}^1\text{H}_2)(\text{H}_2\text{O})]_{\text{aq}}^+ + [(\text{H}_2\text{O})_7\text{AcO}]_{\text{aq}}^-$**

This is Equation (2) of the main text.

In the next tables, for each molecule BS1 refers to the basis set 6-31G(d,p), applied to the main group elements, and the SDD plus f-functions, employed for the metal; BS2 refers to the basis set def2-TZVP for main group and def2-QZVP for d-block elements (see section 3.3 of the main text).

Table S1.1.  $[\text{Cu}(\text{L}^1\text{H}_2)(\text{AcO})]_{\text{aq}}$

|                                             |           |           |           |                |
|---------------------------------------------|-----------|-----------|-----------|----------------|
| Electronic Energy, BS1 (a.u.)               |           |           |           | -1874.7512616  |
| Thermal and entropic correction, BS1 (a.u.) |           |           |           | 0.368166       |
| Electronic Energy, BS2 (a.u.)               |           |           |           | -3318.66519038 |
| C                                           | -2.349435 | -0.906193 | -0.547855 |                |
| C                                           | -1.288851 | 0.008753  | 0.053409  |                |
| H                                           | -2.082579 | -1.123840 | -1.589690 |                |
| H                                           | -1.592981 | 0.329890  | 1.058177  |                |
| H                                           | -1.225338 | 0.900918  | -0.576922 |                |
| C                                           | -1.165477 | -2.812785 | 0.238845  |                |
| C                                           | -1.247791 | -4.181914 | 0.396313  |                |
| C                                           | -0.058075 | -4.923069 | 0.487406  |                |
| C                                           | 1.182806  | -4.304862 | 0.409134  |                |
| C                                           | 1.291910  | -2.906043 | 0.254904  |                |
| C                                           | 0.082591  | -2.112798 | 0.176164  |                |
| H                                           | -2.213148 | -4.671184 | 0.434996  |                |
| H                                           | 2.096390  | -4.888184 | 0.466871  |                |
| C                                           | 0.052834  | -0.677287 | 0.142279  |                |
| N                                           | 1.157411  | 0.029072  | 0.231863  |                |
| O                                           | -2.365368 | -2.156342 | 0.177882  |                |
| O                                           | -0.195781 | -6.271515 | 0.638493  |                |
| H                                           | 0.679749  | -6.687543 | 0.665051  |                |
| C                                           | -3.733476 | -0.314391 | -0.485647 |                |

|    |           |           |           |
|----|-----------|-----------|-----------|
| C  | -4.371205 | -0.154258 | 0.755207  |
| C  | -4.376891 | 0.107501  | -1.647826 |
| C  | -5.633825 | 0.416549  | 0.823267  |
| H  | -3.894529 | -0.480954 | 1.673854  |
| C  | -5.647841 | 0.694860  | -1.587673 |
| H  | -3.892056 | -0.017624 | -2.611351 |
| C  | -6.280061 | 0.850183  | -0.356386 |
| H  | -6.135266 | 1.018199  | -2.499530 |
| O  | -6.247801 | 0.557599  | 2.043975  |
| H  | -7.113448 | 0.972204  | 1.895334  |
| O  | -7.519630 | 1.398492  | -0.150736 |
| C  | -8.243540 | 1.865736  | -1.293756 |
| H  | -8.446213 | 1.047052  | -1.993375 |
| H  | -9.185163 | 2.260559  | -0.910568 |
| H  | -7.694184 | 2.661444  | -1.809400 |
| O  | 2.506970  | -2.411795 | 0.188791  |
| N  | 1.086360  | 1.410006  | 0.275435  |
| H  | 0.222724  | 1.873149  | 0.535534  |
| C  | 2.252582  | 2.084383  | 0.246893  |
| O  | 3.341897  | 1.446290  | 0.167409  |
| C  | 2.221598  | 3.558087  | 0.310902  |
| C  | 3.362165  | 4.221694  | 0.790947  |
| C  | 1.104813  | 4.298895  | -0.111778 |
| C  | 3.376405  | 5.612035  | 0.867346  |
| H  | 4.221700  | 3.641968  | 1.109332  |
| C  | 1.129299  | 5.690047  | -0.036471 |
| H  | 0.233153  | 3.802369  | -0.526541 |
| C  | 2.260578  | 6.347338  | 0.455788  |
| H  | 4.255988  | 6.121943  | 1.247400  |
| H  | 0.268956  | 6.260815  | -0.371136 |
| H  | 2.274772  | 7.431548  | 0.512620  |
| C  | 5.499917  | -0.916980 | -1.045907 |
| O  | 4.876956  | -0.672779 | -2.098683 |
| O  | 4.950958  | -0.971329 | 0.131184  |
| C  | 6.994894  | -1.173777 | -1.062602 |
| H  | 7.208695  | -2.143749 | -0.603412 |
| H  | 7.502441  | -0.410305 | -0.464272 |
| H  | 7.381804  | -1.154956 | -2.082432 |
| Cu | 3.039345  | -0.565395 | 0.162222  |

Table S1.2. (H<sub>2</sub>O)<sub>8</sub>aq

|                                             |                |
|---------------------------------------------|----------------|
| Electronic Energy, BS1 (a.u.)               | -611.57938466  |
| Thermal and entropic correction, BS1 (a.u.) | 0.158165       |
| Electronic Energy, BS2 (a.u.)               | -611.881953741 |

|   |           |           |           |
|---|-----------|-----------|-----------|
| H | -0.593263 | -1.414510 | 1.478025  |
| O | 0.256970  | -1.907593 | 1.425579  |
| H | 0.927771  | -1.191026 | 1.499261  |
| O | 1.890460  | 0.294749  | 1.298777  |
| H | 2.023340  | 0.303247  | 0.309006  |
| H | 2.762621  | 0.425627  | 1.694661  |
| H | 0.439771  | -2.808839 | -1.613773 |
| O | 0.304608  | -1.925398 | -1.245189 |
| H | 0.302346  | -2.029701 | -0.251909 |
| H | 1.461722  | -0.583304 | -1.440704 |
| O | 1.951763  | 0.267704  | -1.372045 |
| H | 1.236206  | 0.937353  | -1.463483 |
| O | -1.935533 | -0.266038 | 1.242506  |
| H | -2.822271 | -0.388086 | 1.607549  |
| H | -2.032814 | -0.294100 | 0.248899  |
| O | -0.306082 | 1.941284  | 1.374905  |
| H | 0.540980  | 1.448009  | 1.465221  |
| H | -0.980329 | 1.227199  | 1.441230  |
| O | -0.259425 | 1.895629  | -1.296566 |
| H | -0.385433 | 2.772206  | -1.684249 |
| H | -0.292051 | 2.019287  | -0.306189 |
| O | -1.902194 | -0.300479 | -1.428681 |
| H | -1.409604 | 0.549000  | -1.498475 |
| H | -1.183534 | -0.971224 | -1.479367 |

Table S1.3. [Cu(L<sup>1</sup>H<sub>2</sub>)(H<sub>2</sub>O)]<sup>+</sup>aq

|                                             |   |                |
|---------------------------------------------|---|----------------|
| Electronic Energy, BS1 (a.u.)               | = | -1722.54133998 |
| Thermal and entropic correction, BS1 (a.u.) | = | 0.348554       |

Electronic Energy, BS2 (a.u.) = -3166.3895989

|   |           |           |           |
|---|-----------|-----------|-----------|
| C | -1.985048 | -0.764904 | -0.537187 |
| C | -0.824528 | 0.016043  | 0.069672  |
| H | -1.766946 | -0.958514 | -1.595102 |
| H | -1.052015 | 0.281225  | 1.110235  |
| H | -0.709834 | 0.945069  | -0.495746 |
| C | -0.961745 | -2.806362 | 0.126029  |
| C | -1.160952 | -4.165793 | 0.265491  |
| C | -0.041314 | -5.013698 | 0.273803  |
| C | 1.245120  | -4.510675 | 0.118821  |
| C | 1.472205  | -3.127580 | -0.021876 |
| C | 0.341750  | -2.223994 | 0.006506  |
| H | -2.163535 | -4.565748 | 0.353178  |
| H | 2.100978  | -5.178016 | 0.103225  |
| C | 0.447605  | -0.793338 | 0.031352  |
| N | 1.619325  | -0.200698 | 0.064874  |
| O | -2.095021 | -2.040312 | 0.135126  |
| O | -0.289169 | -6.345689 | 0.419757  |
| H | 0.547245  | -6.837151 | 0.406445  |
| C | -3.302781 | -0.046774 | -0.410981 |
| C | -3.926650 | 0.069361  | 0.841380  |
| C | -3.888822 | 0.545751  | -1.528478 |
| C | -5.121060 | 0.765140  | 0.964322  |
| H | -3.493917 | -0.389136 | 1.724627  |
| C | -5.087091 | 1.262039  | -1.411035 |
| H | -3.414885 | 0.455739  | -2.501297 |
| C | -5.706588 | 1.374526  | -0.168566 |
| H | -5.528926 | 1.718621  | -2.288443 |
| O | -5.725575 | 0.857144  | 2.194273  |
| H | -6.549399 | 1.359784  | 2.085350  |
| O | -6.877962 | 2.038055  | 0.090001  |
| C | -7.542757 | 2.677853  | -1.004327 |
| H | -7.830338 | 1.949669  | -1.771003 |
| H | -8.437402 | 3.137733  | -0.583033 |
| H | -6.908909 | 3.451229  | -1.452678 |
| O | 2.722753  | -2.746554 | -0.177244 |
| N | 1.700685  | 1.176600  | 0.155740  |
| H | 0.921124  | 1.711175  | 0.522112  |
| C | 2.919474  | 1.725170  | -0.007303 |
| O | 3.911150  | 0.975607  | -0.258818 |

|    |          |           |           |
|----|----------|-----------|-----------|
| C  | 3.072999 | 3.185995  | 0.118344  |
| C  | 4.344847 | 3.687767  | 0.439625  |
| C  | 2.000599 | 4.071300  | -0.085857 |
| C  | 4.536625 | 5.060279  | 0.574023  |
| H  | 5.167246 | 2.997590  | 0.592494  |
| C  | 2.202663 | 5.443350  | 0.045925  |
| H  | 1.021225 | 3.702446  | -0.373921 |
| C  | 3.466771 | 5.938970  | 0.378888  |
| H  | 5.518490 | 5.444511  | 0.831590  |
| H  | 1.375419 | 6.125949  | -0.119891 |
| H  | 3.618872 | 7.009157  | 0.481142  |
| Cu | 3.403392 | -0.971425 | -0.233410 |
| O  | 5.307539 | -1.669030 | -0.449191 |
| H  | 5.747585 | -1.200394 | -1.176730 |
| H  | 5.261835 | -2.597273 | -0.730628 |

Table S1.4.  $[(\text{H}_2\text{O})_7\cdot\text{AcO}]^-_{\text{aq}}$

|                                             |                |
|---------------------------------------------|----------------|
| Electronic Energy, BS1 (a.u.)               | -764.238502286 |
| Thermal and entropic correction, BS1 (a.u.) | 0.187176       |
| Electronic Energy, BS2 (a.u.)               | -764.599379292 |

|   |           |           |           |
|---|-----------|-----------|-----------|
| C | 0.182621  | -1.409710 | 0.531281  |
| O | 1.283094  | -0.851867 | 0.830026  |
| C | 0.220791  | -2.769310 | -0.146177 |
| H | 0.121559  | -3.543107 | 0.624049  |
| H | -0.618966 | -2.877615 | -0.836112 |
| H | 1.166714  | -2.923635 | -0.668229 |
| O | -0.954111 | -0.913456 | 0.807391  |
| H | 1.427875  | 0.892693  | 1.042882  |
| H | -1.440035 | 0.787293  | 0.951863  |
| O | -1.878147 | 1.661643  | 0.841349  |
| O | 1.617684  | 1.857449  | 0.982773  |
| H | 1.054778  | 2.139812  | 0.227064  |
| H | 3.130239  | 1.588589  | -0.028608 |
| H | 2.646527  | -1.278772 | -0.099496 |

|   |           |           |           |
|---|-----------|-----------|-----------|
| O | 3.432494  | -1.447703 | -0.680057 |
| H | 4.115188  | -1.738864 | -0.059357 |
| O | 3.883720  | 1.358830  | -0.613492 |
| H | 3.787428  | 0.391204  | -0.716686 |
| H | -2.252653 | -1.409041 | -0.148390 |
| O | -3.012204 | -1.624812 | -0.752965 |
| H | -3.580128 | -2.196372 | -0.216991 |
| H | -3.793297 | -0.069549 | -0.652780 |
| O | -4.159596 | 0.837570  | -0.498124 |
| H | -4.750614 | 0.715717  | 0.258447  |
| H | -0.867701 | 2.242622  | -0.399814 |
| O | -0.171845 | 2.548437  | -1.042118 |
| H | -0.186427 | 3.511643  | -0.950066 |
| H | -2.709660 | 1.432762  | 0.363327  |

**Section S2.  $[\text{Cu}(\text{L}^1\text{H}_2^{\text{am}})(\text{H}_2\text{O})]^+_{\text{aq}} + (\text{H}_2\text{O})_{14\text{aq}} \rightleftharpoons [\text{Cu}(\text{L}^1\text{H}^{\text{im}})(\text{H}_2\text{O})]_{\text{aq}} + [(\text{H}_2\text{O})_{14}\cdot\text{H}]^+_{\text{aq}}$**

This is Equation (3) of the main text.

In the next tables, for each molecule BS1 refers to the basis set 6-31G(d,p), applied to the main group elements, and the SDD plus f-functions, employed for the metal; BS2 refers to the basis set def2-TZVP for main group and def2-QZVP for d-block elements (see section 3.3 of the main text).

$[\text{Cu}(\text{L}^1\text{H}_2^{\text{am}})(\text{H}_2\text{O})]^+_{\text{aq}}$ . See  $[\text{Cu}(\text{L}^1\text{H}_2)(\text{H}_2\text{O})]^+_{\text{aq}}$  in Table S1.3.

Table S2.1.  $(\text{H}_2\text{O})_{14\text{aq}}$

|                                             |                |           |           |
|---------------------------------------------|----------------|-----------|-----------|
| Electronic Energy, BS1 (a.u.)               | -1070.28441612 |           |           |
| Thermal and entropic correction, BS1 (a.u.) | 0.292603       |           |           |
| Electronic Energy, BS2 (a.u.)               | -1070.80705726 |           |           |
| O                                           | 3.553290       | 0.181752  | -1.254464 |
| H                                           | 3.602846       | 0.072659  | -0.276425 |
| H                                           | 2.963691       | 0.963301  | -1.356848 |
| O                                           | 1.875248       | 2.362026  | -1.219451 |
| H                                           | 0.959044       | 2.028250  | -1.382967 |
| H                                           | 2.000857       | 3.111161  | -1.817263 |
| H                                           | -1.493221      | 1.438825  | -1.516241 |
| O                                           | -0.532889      | 1.217952  | -1.499775 |
| H                                           | -0.494831      | 0.225146  | -1.485199 |
| H                                           | 2.651070       | -1.178592 | -1.539798 |
| O                                           | 2.114905       | -2.024041 | -1.572611 |
| H                                           | 2.561693       | -2.609834 | -2.198194 |
| O                                           | -0.493172      | -1.453215 | -1.253162 |
| H                                           | -0.476797      | -1.467094 | -0.264549 |
| H                                           | 0.413949       | -1.737432 | -1.518175 |

|   |           |           |           |
|---|-----------|-----------|-----------|
| H | 0.440509  | 1.723172  | 1.490773  |
| O | -0.435866 | 1.317289  | 1.259330  |
| H | -0.450837 | 1.322279  | 0.272705  |
| H | -0.436007 | -0.367908 | 1.493742  |
| O | -0.524753 | -1.356608 | 1.489904  |
| H | -1.495663 | -1.516811 | 1.531446  |
| H | 2.506040  | 1.415361  | 1.607210  |
| O | 2.060169  | 2.289893  | 1.541325  |
| H | 2.069361  | 2.466567  | 0.574970  |
| O | 1.972047  | -2.459142 | 1.148996  |
| H | 1.045644  | -2.180409 | 1.315723  |
| H | 2.047146  | -2.441970 | 0.167885  |
| O | 3.299720  | -0.165719 | 1.457462  |
| H | 4.092009  | -0.351348 | 1.979680  |
| H | 2.789890  | -1.024541 | 1.418780  |
| O | -3.213108 | 1.420921  | -1.209834 |
| H | -3.845332 | 2.061956  | -1.561649 |
| H | -3.268223 | 1.482381  | -0.214359 |
| O | -3.253078 | -1.321475 | -1.429378 |
| H | -2.292094 | -1.477829 | -1.541100 |
| H | -3.330100 | -0.340852 | -1.466810 |
| O | -3.229109 | -1.381691 | 1.250502  |
| H | -3.892098 | -1.987672 | 1.607978  |
| H | -3.303173 | -1.437219 | 0.256883  |
| O | -3.177069 | 1.364891  | 1.462874  |
| H | -3.291552 | 0.388149  | 1.504142  |
| H | -2.204493 | 1.477641  | 1.543915  |

Table S2.2.  $[\text{Cu}(\text{L}^1\text{H}^{\text{im}})(\text{H}_2\text{O})]_{\text{aq}}$

|                                             |           |                |           |
|---------------------------------------------|-----------|----------------|-----------|
| Electronic Energy, BS1 (a.u.)               |           | -1722.07604322 |           |
| Thermal and entropic correction, BS1 (a.u.) |           | 0.335725       |           |
| Electronic Energy, BS2 (a.u.)               |           | -3165.9283957  |           |
| C                                           | -1.979184 | -0.720057      | -0.609541 |
| C                                           | -0.815398 | 0.037547       | 0.014317  |



|   |           |           |           |
|---|-----------|-----------|-----------|
| H | -1.774953 | -0.877979 | -1.676786 |
| H | -1.039851 | 0.257230  | 1.066145  |
| H | -0.684617 | 0.993430  | -0.493317 |
| C | -0.955392 | -2.783803 | 0.018714  |
| C | -1.169632 | -4.147822 | 0.129490  |
| C | -0.059881 | -5.003542 | 0.151713  |
| C | 1.231460  | -4.503181 | 0.041772  |
| C | 1.469537  | -3.116836 | -0.066297 |
| C | 0.348559  | -2.205748 | -0.064151 |
| H | -2.178155 | -4.538772 | 0.186894  |
| H | 2.085894  | -5.173122 | 0.045352  |
| C | 0.461246  | -0.764240 | -0.051966 |
| N | 1.619381  | -0.149934 | -0.047012 |
| O | -2.093340 | -2.019348 | 0.017620  |
| O | -0.317478 | -6.342137 | 0.270095  |
| H | 0.519536  | -6.831960 | 0.272889  |
| C | -3.298191 | -0.009914 | -0.442160 |
| C | -3.904116 | 0.056576  | 0.822849  |
| C | -3.905454 | 0.621784  | -1.526347 |
| C | -5.099331 | 0.741212  | 0.991322  |
| H | -3.455693 | -0.432771 | 1.681344  |
| C | -5.105868 | 1.326282  | -1.363337 |
| H | -3.446790 | 0.571444  | -2.509394 |
| C | -5.706597 | 1.388241  | -0.108197 |
| H | -5.564294 | 1.812866  | -2.215866 |
| O | -5.684251 | 0.784528  | 2.234062  |
| H | -6.510006 | 1.289887  | 2.157441  |
| O | -6.878855 | 2.033521  | 0.193643  |
| C | -7.570122 | 2.699826  | -0.867410 |
| H | -7.863810 | 1.993137  | -1.651793 |
| H | -8.462024 | 3.136004  | -0.415977 |
| H | -6.953380 | 3.494444  | -1.302385 |
| O | 2.729984  | -2.740471 | -0.162425 |
| N | 1.640766  | 1.234207  | 0.015851  |
| C | 2.879398  | 1.682145  | 0.051089  |
| O | 3.942535  | 0.918062  | 0.040663  |
| C | 3.084766  | 3.153776  | 0.106826  |
| C | 4.389028  | 3.671035  | 0.155603  |
| C | 1.997876  | 4.046076  | 0.106644  |
| C | 4.603091  | 5.048985  | 0.202721  |
| H | 5.231504  | 2.988422  | 0.156092  |

|    |          |           |           |
|----|----------|-----------|-----------|
| C  | 2.214853 | 5.421314  | 0.153646  |
| H  | 0.987711 | 3.654757  | 0.068507  |
| C  | 3.517938 | 5.928650  | 0.201560  |
| H  | 5.617633 | 5.434907  | 0.239833  |
| H  | 1.366546 | 6.099591  | 0.152143  |
| H  | 3.684628 | 7.001294  | 0.237206  |
| Cu | 3.394747 | -0.957917 | -0.078943 |
| O  | 5.329952 | -1.687768 | -0.151127 |
| H  | 5.864473 | -1.116048 | -0.724516 |
| H  | 5.307060 | -2.548013 | -0.599760 |

Table S2.3.  $[(\text{H}_2\text{O})_{14}\cdot\text{H}]^+_{\text{aq}}$

|                                             |                |
|---------------------------------------------|----------------|
| Electronic Energy, BS1 (a.u.)               | -1070.74424028 |
| Thermal and entropic correction, BS1 (a.u.) | 0.303167       |
| Electronic Energy, BS2 (a.u.)               | -1071.25351115 |

|   |           |           |           |
|---|-----------|-----------|-----------|
| O | -3.693781 | -0.161886 | 0.716538  |
| H | -4.628152 | -0.005772 | 0.910816  |
| H | -3.353542 | 0.670353  | 0.292993  |
| O | -0.397246 | 2.694948  | 0.910859  |
| H | -1.156570 | 2.421508  | 0.338725  |
| H | 0.371205  | 2.772088  | 0.303536  |
| O | 2.306254  | -0.440089 | 1.826987  |
| H | 2.843844  | 0.089266  | 1.193427  |
| H | 2.173912  | -1.299727 | 1.367547  |
| O | 3.716574  | 0.874471  | -0.125101 |
| H | 4.669190  | 1.010915  | -0.030796 |
| H | 3.595566  | 0.146887  | -0.784477 |
| O | -1.780768 | 0.376327  | -2.591079 |
| H | -2.226209 | -0.440604 | -2.275334 |
| H | -0.864308 | 0.280993  | -2.238834 |
| O | -0.522488 | -1.925857 | 0.090930  |
| H | -0.169397 | -1.067483 | -0.253648 |
| H | -1.313519 | -2.098188 | -0.471031 |
| O | -2.534707 | 1.883597  | -0.549707 |

|   |           |           |           |
|---|-----------|-----------|-----------|
| H | -3.111101 | 2.604302  | -0.841160 |
| H | -2.274344 | 1.382585  | -1.379919 |
| O | -1.665551 | -0.995306 | 2.336885  |
| H | -1.247140 | -1.477611 | 1.577756  |
| H | -2.473903 | -0.619941 | 1.916243  |
| O | 2.906245  | -1.150760 | -1.676251 |
| H | 2.687503  | -1.870320 | -1.032768 |
| H | 3.236431  | -1.576053 | -2.478802 |
| O | 2.002246  | -2.722779 | 0.286605  |
| H | 1.022106  | -2.666118 | 0.162345  |
| H | 2.201206  | -3.624498 | 0.572197  |
| O | -2.864171 | -1.799297 | -1.268518 |
| H | -3.304625 | -1.283537 | -0.547314 |
| H | -3.495642 | -2.476693 | -1.545592 |
| O | 0.560910  | 0.162015  | -1.225839 |
| H | 0.876022  | 1.044454  | -0.936612 |
| H | 1.365740  | -0.296449 | -1.560593 |
| O | 1.789818  | 2.633956  | -0.718306 |
| H | 2.595781  | 2.099283  | -0.509471 |
| H | 1.848660  | 2.849723  | -1.659046 |
| O | 0.153278  | 0.762771  | 2.433968  |
| H | -0.627191 | 0.077893  | 2.416555  |
| H | 1.013919  | 0.274230  | 2.130752  |
| H | -0.068345 | 1.541629  | 1.778743  |

### Section S3. $[\text{Cu}(\text{L}^3\text{H}_2\text{-}\kappa\text{S})(\text{AcO})]_{\text{aq}} \rightleftharpoons [\text{Cu}(\text{L}^3\text{H}_2\text{-}\kappa\text{N})(\text{AcO})]_{\text{aq}}$

This is Equation (4) of the main text.

In the next tables, for each molecule BS1 refers to the basis set 6-31G(d,p), applied to the main group elements, and the SDD plus f-functions, employed for the metal; BS2 refers to the basis set def2-TZVP for main group and def2-QZVP for d-block elements (see section 3.3 of the main text).

Table S3.1.  $[\text{Cu}(\text{L}^3\text{H}_2\text{-}\kappa\text{S})(\text{AcO})]_{\text{aq}}$

|                                             |           |                |           |
|---------------------------------------------|-----------|----------------|-----------|
| Electronic Energy, BS1 (a.u.)               |           | -2022.01285334 |           |
| Thermal and entropic correction, BS1 (a.u.) |           | 0.305947       |           |
| C                                           | -1.979018 | 0.475960       | 0.476524  |
| C                                           | -1.152370 | -0.461962      | -0.396095 |
| H                                           | -1.582620 | 0.449551       | 1.499766  |
| H                                           | -1.570352 | -0.492007      | -1.410779 |
| H                                           | -1.229305 | -1.466234      | 0.028172  |
| C                                           | -0.563611 | 2.278959       | -0.164439 |
| C                                           | -0.430667 | 3.654057       | -0.179558 |
| C                                           | 0.849465  | 4.207714       | -0.341443 |
| C                                           | 1.971631  | 3.399979       | -0.466716 |
| C                                           | 1.859854  | 1.992871       | -0.448491 |
| C                                           | 0.550528  | 1.389995       | -0.313590 |
| H                                           | -1.299858 | 4.287792       | -0.054149 |
| H                                           | 2.959837  | 3.836454       | -0.573347 |
| C                                           | 0.290617  | -0.016370      | -0.455288 |
| N                                           | 1.253429  | -0.892892      | -0.669793 |
| O                                           | -1.845328 | 1.824212       | -0.020051 |
| O                                           | 0.924795  | 5.570169       | -0.344356 |
| H                                           | 1.850373  | 5.843113       | -0.440340 |
| C                                           | -3.444060 | 0.123810       | 0.486235  |
| C                                           | -4.230495 | 0.356165       | -0.653401 |
| C                                           | -4.019438 | -0.470531      | 1.608178  |

|    |           |           |           |
|----|-----------|-----------|-----------|
| C  | -5.571764 | 0.000744  | -0.660508 |
| H  | -3.807448 | 0.823017  | -1.536932 |
| C  | -5.370326 | -0.842607 | 1.605909  |
| H  | -3.418836 | -0.649499 | 2.494974  |
| C  | -6.150247 | -0.608115 | 0.475889  |
| H  | -5.802072 | -1.303455 | 2.486189  |
| O  | -6.329891 | 0.243642  | -1.780134 |
| H  | -7.230307 | -0.075245 | -1.604652 |
| O  | -7.479797 | -0.912206 | 0.336158  |
| C  | -8.145152 | -1.538287 | 1.438099  |
| H  | -8.130891 | -0.894170 | 2.324576  |
| H  | -9.175540 | -1.693554 | 1.116188  |
| H  | -7.685780 | -2.503767 | 1.678439  |
| O  | 2.966845  | 1.304051  | -0.571820 |
| N  | 0.871164  | -2.200696 | -0.940161 |
| H  | -0.012840 | -2.357112 | -1.415948 |
| C  | 1.749826  | -3.215224 | -0.851137 |
| C  | 5.313443  | -0.182707 | 1.401198  |
| O  | 4.423541  | -0.148035 | 2.275210  |
| O  | 5.089825  | -0.373068 | 0.136165  |
| C  | 6.775274  | -0.007697 | 1.768664  |
| H  | 7.203392  | 0.823092  | 1.199478  |
| H  | 7.330103  | -0.911055 | 1.495582  |
| H  | 6.887883  | 0.181028  | 2.837239  |
| Cu | 3.195437  | -0.602431 | -0.315508 |
| N  | 1.321400  | -4.427815 | -1.205382 |
| H  | 0.359465  | -4.592366 | -1.478360 |
| H  | 1.946496  | -5.219027 | -1.149318 |
| S  | 3.362364  | -2.953554 | -0.304328 |

Table S3.2.  $[\text{Cu}(\text{L}^3\text{H}_2\text{-}\kappa\text{N})(\text{AcO})]_{\text{aq}}$

|                                             |                |
|---------------------------------------------|----------------|
| Electronic Energy, BS1 (a.u.)               | -2022.00121328 |
| Thermal and entropic correction, BS1 (a.u.) | 0.306182       |
| C                                           | -2.047565      |
|                                             | 0.552053       |
|                                             | 0.534764       |

|   |           |           |           |
|---|-----------|-----------|-----------|
| C | -1.119183 | -0.401116 | -0.208109 |
| H | -1.710076 | 0.638938  | 1.575279  |
| H | -1.485523 | -0.560636 | -1.230750 |
| H | -1.139258 | -1.365283 | 0.307949  |
| C | -0.699983 | 2.390592  | -0.149658 |
| C | -0.643590 | 3.768612  | -0.228512 |
| C | 0.612916  | 4.386379  | -0.331741 |
| C | 1.784264  | 3.639934  | -0.336409 |
| C | 1.752310  | 2.232417  | -0.255302 |
| C | 0.469591  | 1.563033  | -0.178887 |
| H | -1.553072 | 4.355788  | -0.199358 |
| H | 2.750824  | 4.130117  | -0.398409 |
| C | 0.288137  | 0.140569  | -0.262015 |
| N | 1.308156  | -0.672656 | -0.433182 |
| O | -1.959559 | 1.861581  | -0.072061 |
| O | 0.617969  | 5.747957  | -0.405605 |
| H | 1.533510  | 6.065194  | -0.448577 |
| C | -3.488910 | 0.115938  | 0.499900  |
| C | -4.195152 | 0.120301  | -0.713877 |
| C | -4.121927 | -0.325110 | 1.660841  |
| C | -5.513573 | -0.309623 | -0.756637 |
| H | -3.727387 | 0.464316  | -1.630832 |
| C | -5.450612 | -0.768518 | 1.625899  |
| H | -3.583491 | -0.328028 | 2.603782  |
| C | -6.150495 | -0.760791 | 0.421684  |
| H | -5.928597 | -1.108759 | 2.536679  |
| O | -6.191304 | -0.294423 | -1.951465 |
| H | -7.086014 | -0.636669 | -1.791536 |
| O | -7.450127 | -1.158416 | 0.243154  |
| C | -8.169957 | -1.632054 | 1.386034  |
| H | -8.250914 | -0.852180 | 2.151636  |
| H | -9.165170 | -1.894166 | 1.025065  |
| H | -7.689638 | -2.518834 | 1.814679  |
| O | 2.912169  | 1.613988  | -0.254911 |
| N | 1.059113  | -2.021226 | -0.653943 |
| H | 0.181482  | -2.300342 | -1.082811 |
| C | 2.063348  | -2.913772 | -0.633881 |
| C | 5.626453  | -0.568180 | 1.152821  |
| O | 4.918651  | -1.085511 | 2.040150  |
| O | 5.162965  | -0.077761 | 0.040032  |
| C | 7.131446  | -0.470667 | 1.309846  |

|    |          |           |           |
|----|----------|-----------|-----------|
| H  | 7.443661 | 0.574866  | 1.226487  |
| H  | 7.620094 | -1.022575 | 0.500559  |
| H  | 7.448785 | -0.874213 | 2.272336  |
| Cu | 3.237527 | -0.275554 | -0.216733 |
| N  | 3.254910 | -2.373341 | -0.065466 |
| H  | 3.235663 | -2.404164 | 0.960260  |
| H  | 4.076556 | -2.892129 | -0.368903 |
| S  | 1.933363 | -4.464307 | -1.237817 |

## Section S4. Estimation of the rotational barrier

The rotational barrier ( $\Delta E^\ddagger$  in Figure S1) was estimated through scan analysis of the dihedral O–Cu–O1–O2 (Figure S1). The  $\Delta G$  of the rotation was estimated by the energy difference between the species **I** and **II**, each one corrected with the thermal and entropic contribution obtained from the frequency calculation (for **I** see  $[\text{Cu}(\text{L}^1\text{H}_2)(\text{AcO})]_{\text{aq}}$  Table S1.1, for **II** see the Cartesian coordinates scheme below in this subsection).

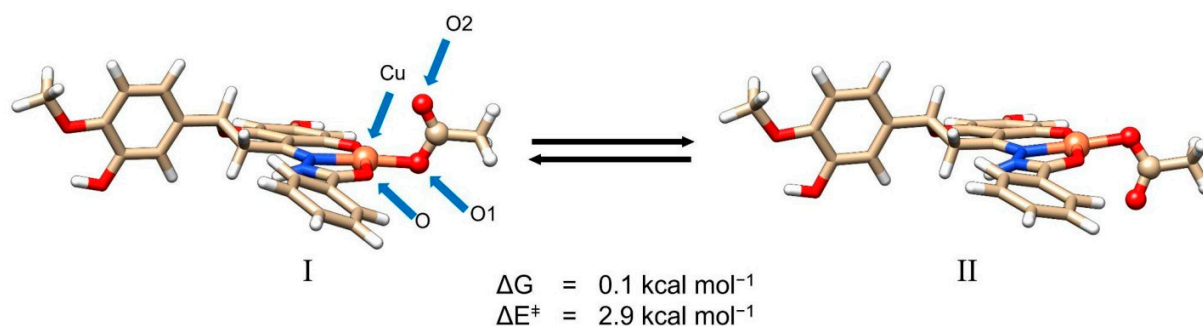

**Figure S1.** Scheme of reaction of the rotation of the monodentate acetate ligand around the bond Cu–O1. The values of  $\Delta G$  and of the energy barrier  $\Delta E^\ddagger$  for the flipping of the acetate ligand are also shown.

Table S4.1. **II**

|                                             |           |           |           |              |
|---------------------------------------------|-----------|-----------|-----------|--------------|
| Electronic Energy, BS1 (a.u.)               |           |           |           | -1874.751477 |
| Thermal and entropic correction, BS1 (a.u.) |           |           |           | 0.368563     |
| C                                           | -2.410011 | -0.887188 | -0.547357 |              |
| C                                           | -1.310799 | 0.019887  | -0.007211 |              |
| H                                           | -2.212343 | -1.092758 | -1.607046 |              |
| H                                           | -1.535227 | 0.309247  | 1.027676  |              |
| H                                           | -1.297052 | 0.931119  | -0.612785 |              |
| C                                           | -1.171022 | -2.802808 | 0.116048  |              |



|   |           |           |           |
|---|-----------|-----------|-----------|
| C | -1.236000 | -4.172820 | 0.276296  |
| C | -0.041302 | -4.910990 | 0.248904  |
| C | 1.184217  | -4.291487 | 0.041576  |
| C | 1.275421  | -2.892531 | -0.120008 |
| C | 0.064689  | -2.100698 | -0.059285 |
| H | -2.192118 | -4.664372 | 0.406966  |
| H | 2.098393  | -4.875313 | -0.000530 |
| C | 0.033542  | -0.664884 | -0.051300 |
| N | 1.142891  | 0.038902  | -0.035055 |
| O | -2.371419 | -2.146269 | 0.164318  |
| O | -0.157570 | -6.259676 | 0.414402  |
| H | 0.720180  | -6.668467 | 0.361734  |
| C | -3.789813 | -0.304367 | -0.390765 |
| C | -4.345422 | -0.144170 | 0.889027  |
| C | -4.514661 | 0.102349  | -1.509755 |
| C | -5.608090 | 0.411461  | 1.037548  |
| H | -3.805083 | -0.460044 | 1.775698  |
| C | -5.786060 | 0.674121  | -1.368831 |
| H | -4.093770 | -0.023127 | -2.502843 |
| C | -6.337016 | 0.828923  | -0.099052 |
| H | -6.336445 | 0.985647  | -2.248400 |
| O | -6.141711 | 0.552867  | 2.295415  |
| H | -7.023873 | 0.948293  | 2.201301  |
| O | -7.567040 | 1.362582  | 0.185630  |
| C | -8.386893 | 1.780479  | -0.910721 |
| H | -8.616103 | 0.938757  | -1.573895 |
| H | -9.308847 | 2.158630  | -0.467572 |
| H | -7.901589 | 2.578095  | -1.484389 |
| O | 2.473667  | -2.396023 | -0.327724 |
| N | 1.076170  | 1.417754  | 0.061939  |
| H | 0.255249  | 1.861090  | 0.459622  |
| C | 2.229579  | 2.098320  | -0.093733 |
| O | 3.296258  | 1.469580  | -0.352924 |
| C | 2.212961  | 3.567891  | 0.041111  |
| C | 3.419197  | 4.214663  | 0.354885  |
| C | 1.044325  | 4.322606  | -0.157636 |
| C | 3.450741  | 5.600621  | 0.486688  |
| H | 4.317509  | 3.625162  | 0.502258  |
| C | 1.085369  | 5.709197  | -0.028296 |
| H | 0.113993  | 3.840286  | -0.440742 |
| C | 2.285113  | 6.349043  | 0.296520  |

|    |          |           |           |
|----|----------|-----------|-----------|
| H  | 4.382856 | 6.097199  | 0.737150  |
| H  | 0.183268 | 6.290295  | -0.191019 |
| H  | 2.312537 | 7.429933  | 0.395702  |
| C  | 5.681588 | -0.935617 | 0.196136  |
| O  | 5.341304 | -0.673471 | 1.367289  |
| O  | 4.861177 | -0.973953 | -0.810430 |
| C  | 7.126412 | -1.244247 | -0.148031 |
| H  | 7.478829 | -0.551705 | -0.918585 |
| H  | 7.195110 | -2.255418 | -0.561669 |
| H  | 7.762026 | -1.166879 | 0.735235  |
| Cu | 3.005357 | -0.547721 | -0.366428 |

## Section S5. Docking calculations

### Section S5.1. Docking ligand structures

In this section, the MOL2 files of each ligand structure implemented for the docking calculations is presented. The scoring function GoldScore was implemented with the GoldScore and GOLD parameter files used by Sciortino et al. [1]. DFT-computed energies come along with the coordinates for those structures that have not been described in the previous section.

All the docking ligand structures are summarized in Table 4 of the manuscript.

Table S5.1. (R)-L<sup>1</sup>H<sub>3</sub><sup>am</sup> (HHSB; C<sub>23</sub>N<sub>2</sub>H<sub>20</sub>O<sub>6</sub>)

Electronic Energy, BS1 (a.u.) -1449.40950886

Thermal and entropic correction, BS1 (a.u.) 0.336636

```
@<TRIPOS>MOLECULE
C23N2H20O6
51 54 1 0 0
r-HHSB
NO_CHARGES
```

```
@<TRIPOS>ATOM
1 C1 1.5462 0.5444 -0.5900 C.3 1 UNK 0.0000
2 C2 0.2270 0.0790 0.0314 C.3 1 UNK 0.0000
3 H1 1.3863 0.7331 -1.6590 H 1 UNK 0.0000
4 H2 0.3849 -0.1790 1.0862 H 1 UNK 0.0000
5 H3 -0.0872 -0.8308 -0.4889 H 1 UNK 0.0000
6 C3 1.0442 2.8044 -0.0038 C.ar 1 UNK 0.0000
7 C4 1.5454 4.0977 0.0739 C.ar 1 UNK 0.0000
8 C5 0.6463 5.1702 0.0685 C.ar 1 UNK 0.0000
9 C6 -0.7323 4.9603 -0.0235 C.ar 1 UNK 0.0000
10 C7 -1.2254 3.6578 -0.0960 C.ar 1 UNK 0.0000
11 C8 -0.3442 2.5373 -0.0846 C.ar 1 UNK 0.0000
12 H4 2.6138 4.2688 0.1256 H 1 UNK 0.0000
13 H5 -1.4257 5.7950 -0.0312 H 1 UNK 0.0000
14 C9 -0.8174 1.1613 -0.0658 C.2 1 UNK 0.0000
15 N1 -2.1018 0.9686 -0.0979 N.2 1 UNK 0.0000
16 O1 1.9670 1.7921 0.0188 O.3 1 UNK 0.0000
```

|    |     |         |         |              |       |        |
|----|-----|---------|---------|--------------|-------|--------|
| 17 | O2  | 1.1818  | 6.4253  | 0.1430 O.3   | 1 UNK | 0.0000 |
| 18 | H6  | 0.4703  | 7.0831  | 0.1055 H     | 1 UNK | 0.0000 |
| 19 | C10 | 2.6585  | -0.4551 | -0.4079 C.ar | 1 UNK | 0.0000 |
| 20 | C11 | 3.1971  | -0.6814 | 0.8691 C.ar  | 1 UNK | 0.0000 |
| 21 | C12 | 3.1291  | -1.1945 | -1.4919 C.ar | 1 UNK | 0.0000 |
| 22 | C13 | 4.1916  | -1.6320 | 1.0494 C.ar  | 1 UNK | 0.0000 |
| 23 | H7  | 2.8517  | -0.1154 | 1.7282 H     | 1 UNK | 0.0000 |
| 24 | C14 | 4.1262  | -2.1636 | -1.3175 C.ar | 1 UNK | 0.0000 |
| 25 | H8  | 2.7200  | -1.0234 | -2.4831 H    | 1 UNK | 0.0000 |
| 26 | C15 | 4.6606  | -2.3849 | -0.0505 C.ar | 1 UNK | 0.0000 |
| 27 | H9  | 4.4800  | -2.7311 | -2.1699 H    | 1 UNK | 0.0000 |
| 28 | O3  | 4.7131  | -1.8382 | 2.3037 O.3   | 1 UNK | 0.0000 |
| 29 | H10 | 5.3854  | -2.5358 | 2.2333 H     | 1 UNK | 0.0000 |
| 30 | O4  | 5.6381  | -3.2930 | 0.2652 O.3   | 1 UNK | 0.0000 |
| 31 | C16 | 6.1592  | -4.1114 | -0.7870 C.3  | 1 UNK | 0.0000 |
| 32 | H11 | 6.6361  | -3.5008 | -1.5620 H    | 1 UNK | 0.0000 |
| 33 | H12 | 6.9043  | -4.7580 | -0.3219 H    | 1 UNK | 0.0000 |
| 34 | H13 | 5.3702  | -4.7245 | -1.2368 H    | 1 UNK | 0.0000 |
| 35 | N2  | -2.6164 | -0.2930 | -0.0253 N.am | 1 UNK | 0.0000 |
| 36 | H14 | -2.0160 | -1.0798 | 0.1971 H     | 1 UNK | 0.0000 |
| 37 | C17 | -3.9751 | -0.4560 | -0.0794 C.2  | 1 UNK | 0.0000 |
| 38 | O5  | -4.7467 | 0.5071  | -0.1807 O.2  | 1 UNK | 0.0000 |
| 39 | C18 | -4.4630 | -1.8651 | 0.0045 C.ar  | 1 UNK | 0.0000 |
| 40 | C19 | -5.7750 | -2.0671 | 0.4596 C.ar  | 1 UNK | 0.0000 |
| 41 | C20 | -3.6862 | -2.9722 | -0.3748 C.ar | 1 UNK | 0.0000 |
| 42 | C21 | -6.2955 | -3.3556 | 0.5573 C.ar  | 1 UNK | 0.0000 |
| 43 | H15 | -6.3736 | -1.2068 | 0.7396 H     | 1 UNK | 0.0000 |
| 44 | C22 | -4.2134 | -4.2604 | -0.2818 C.ar | 1 UNK | 0.0000 |
| 45 | H16 | -2.6833 | -2.8397 | -0.7695 H    | 1 UNK | 0.0000 |
| 46 | C23 | -5.5149 | -4.4553 | 0.1880 C.ar  | 1 UNK | 0.0000 |
| 47 | H17 | -7.3083 | -3.5027 | 0.9197 H     | 1 UNK | 0.0000 |
| 48 | H18 | -3.6098 | -5.1105 | -0.5843 H    | 1 UNK | 0.0000 |
| 49 | H19 | -5.9212 | -5.4597 | 0.2605 H     | 1 UNK | 0.0000 |
| 50 | O6  | -2.5703 | 3.4977  | -0.1677 O.3  | 1 UNK | 0.0000 |
| 51 | H20 | -2.7505 | 2.5139  | -0.1680 H    | 1 UNK | 0.0000 |

@<TRIPOS>BOND

|    |   |       |
|----|---|-------|
| 1  | 1 | 2 1   |
| 2  | 1 | 3 1   |
| 3  | 1 | 16 1  |
| 4  | 1 | 19 1  |
| 5  | 2 | 4 1   |
| 6  | 2 | 5 1   |
| 7  | 2 | 14 1  |
| 8  | 6 | 7 ar  |
| 9  | 6 | 11 ar |
| 10 | 6 | 16 1  |
| 11 | 7 | 8 ar  |
| 12 | 7 | 12 1  |
| 13 | 8 | 9 ar  |

|    |    |       |
|----|----|-------|
| 14 | 8  | 17 1  |
| 15 | 9  | 10 ar |
| 16 | 9  | 13 1  |
| 17 | 10 | 11 ar |
| 18 | 10 | 50 1  |
| 19 | 11 | 14 1  |
| 20 | 14 | 15 2  |
| 21 | 15 | 35 1  |
| 22 | 17 | 18 1  |
| 23 | 19 | 20 ar |
| 24 | 19 | 21 ar |
| 25 | 20 | 22 ar |
| 26 | 20 | 23 1  |
| 27 | 21 | 24 ar |
| 28 | 21 | 25 1  |
| 29 | 22 | 26 ar |
| 30 | 22 | 28 1  |
| 31 | 24 | 26 ar |
| 32 | 24 | 27 1  |
| 33 | 26 | 30 1  |
| 34 | 28 | 29 1  |
| 35 | 30 | 31 1  |
| 36 | 31 | 32 1  |
| 37 | 31 | 33 1  |
| 38 | 31 | 34 1  |
| 39 | 35 | 36 1  |
| 40 | 35 | 37 am |
| 41 | 37 | 38 2  |
| 42 | 37 | 39 1  |
| 43 | 39 | 40 ar |
| 44 | 39 | 41 ar |
| 45 | 40 | 42 ar |
| 46 | 40 | 43 1  |
| 47 | 41 | 44 ar |
| 48 | 41 | 45 1  |
| 49 | 42 | 46 ar |
| 50 | 42 | 47 1  |
| 51 | 44 | 46 ar |
| 52 | 44 | 48 1  |
| 53 | 46 | 49 1  |
| 54 | 50 | 51 1  |

@<TRIPOS>SUBSTRUCTURE

1 UNK      1 RESIDUE

4 A

UNK

0 ROOT

Table S5.2. (*S*)-L<sup>1</sup>H<sub>3</sub><sup>am</sup> (HHSB; C<sub>23</sub>N<sub>2</sub>H<sub>20</sub>O<sub>6</sub>)

Electronic Energy, BS1 (a.u.) -1449.40950886  
 Thermal and entropic correction, BS1 (a.u.) 0.336636

@<TRIPOS>MOLECULE  
 C23N2H20O6  
 51 54 1 0 0  
 s-HHSB  
 NO\_CHARGES

@<TRIPOS>ATOM

|    |     |         |         |         |      |   |     |        |
|----|-----|---------|---------|---------|------|---|-----|--------|
| 1  | C1  | 1.5462  | 0.5444  | 0.5900  | C.3  | 1 | UNK | 0.0000 |
| 2  | C2  | 0.2270  | 0.0790  | -0.0314 | C.3  | 1 | UNK | 0.0000 |
| 3  | H1  | 1.3863  | 0.7331  | 1.6590  | H    | 1 | UNK | 0.0000 |
| 4  | H2  | 0.3849  | -0.1790 | -1.0862 | H    | 1 | UNK | 0.0000 |
| 5  | H3  | -0.0872 | -0.8308 | 0.4889  | H    | 1 | UNK | 0.0000 |
| 6  | C3  | 1.0442  | 2.8044  | 0.0038  | C.ar | 1 | UNK | 0.0000 |
| 7  | C4  | 1.5454  | 4.0977  | -0.0739 | C.ar | 1 | UNK | 0.0000 |
| 8  | C5  | 0.6463  | 5.1702  | -0.0685 | C.ar | 1 | UNK | 0.0000 |
| 9  | C6  | -0.7323 | 4.9603  | 0.0235  | C.ar | 1 | UNK | 0.0000 |
| 10 | C7  | -1.2254 | 3.6578  | 0.0960  | C.ar | 1 | UNK | 0.0000 |
| 11 | C8  | -0.3442 | 2.5373  | 0.0846  | C.ar | 1 | UNK | 0.0000 |
| 12 | H4  | 2.6138  | 4.2688  | -0.1256 | H    | 1 | UNK | 0.0000 |
| 13 | H5  | -1.4257 | 5.7950  | 0.0312  | H    | 1 | UNK | 0.0000 |
| 14 | C9  | -0.8174 | 1.1613  | 0.0658  | C.2  | 1 | UNK | 0.0000 |
| 15 | N1  | -2.1018 | 0.9686  | 0.0979  | N.2  | 1 | UNK | 0.0000 |
| 16 | O1  | 1.9670  | 1.7921  | -0.0188 | O.3  | 1 | UNK | 0.0000 |
| 17 | O2  | 1.1818  | 6.4253  | -0.1430 | O.3  | 1 | UNK | 0.0000 |
| 18 | H6  | 0.4703  | 7.0831  | -0.1055 | H    | 1 | UNK | 0.0000 |
| 19 | C10 | 2.6585  | -0.4551 | 0.4079  | C.ar | 1 | UNK | 0.0000 |
| 20 | C11 | 3.1971  | -0.6814 | -0.8691 | C.ar | 1 | UNK | 0.0000 |
| 21 | C12 | 3.1291  | -1.1945 | 1.4919  | C.ar | 1 | UNK | 0.0000 |
| 22 | C13 | 4.1916  | -1.6320 | -1.0494 | C.ar | 1 | UNK | 0.0000 |
| 23 | H7  | 2.8517  | -0.1154 | -1.7282 | H    | 1 | UNK | 0.0000 |
| 24 | C14 | 4.1262  | -2.1636 | 1.3175  | C.ar | 1 | UNK | 0.0000 |
| 25 | H8  | 2.7200  | -1.0234 | 2.4831  | H    | 1 | UNK | 0.0000 |
| 26 | C15 | 4.6606  | -2.3849 | 0.0505  | C.ar | 1 | UNK | 0.0000 |
| 27 | H9  | 4.4800  | -2.7311 | 2.1699  | H    | 1 | UNK | 0.0000 |
| 28 | O3  | 4.7131  | -1.8382 | -2.3037 | O.3  | 1 | UNK | 0.0000 |
| 29 | H10 | 5.3854  | -2.5358 | -2.2333 | H    | 1 | UNK | 0.0000 |
| 30 | O4  | 5.6381  | -3.2930 | -0.2652 | O.3  | 1 | UNK | 0.0000 |
| 31 | C16 | 6.1592  | -4.1114 | 0.7870  | C.3  | 1 | UNK | 0.0000 |
| 32 | H11 | 6.6361  | -3.5008 | 1.5620  | H    | 1 | UNK | 0.0000 |
| 33 | H12 | 6.9043  | -4.7580 | 0.3219  | H    | 1 | UNK | 0.0000 |
| 34 | H13 | 5.3702  | -4.7245 | 1.2368  | H    | 1 | UNK | 0.0000 |

|    |     |         |         |         |      |   |     |        |
|----|-----|---------|---------|---------|------|---|-----|--------|
| 35 | N2  | -2.6164 | -0.2930 | 0.0253  | N.am | 1 | UNK | 0.0000 |
| 36 | H14 | -2.0160 | -1.0798 | -0.1971 | H    | 1 | UNK | 0.0000 |
| 37 | C17 | -3.9751 | -0.4560 | 0.0794  | C.2  | 1 | UNK | 0.0000 |
| 38 | O5  | -4.7467 | 0.5071  | 0.1807  | O.2  | 1 | UNK | 0.0000 |
| 39 | C18 | -4.4630 | -1.8651 | -0.0045 | C.ar | 1 | UNK | 0.0000 |
| 40 | C19 | -5.7750 | -2.0671 | -0.4596 | C.ar | 1 | UNK | 0.0000 |
| 41 | C20 | -3.6862 | -2.9722 | 0.3748  | C.ar | 1 | UNK | 0.0000 |
| 42 | C21 | -6.2955 | -3.3556 | -0.5573 | C.ar | 1 | UNK | 0.0000 |
| 43 | H15 | -6.3736 | -1.2068 | -0.7396 | H    | 1 | UNK | 0.0000 |
| 44 | C22 | -4.2134 | -4.2604 | 0.2818  | C.ar | 1 | UNK | 0.0000 |
| 45 | H16 | -2.6833 | -2.8397 | 0.7695  | H    | 1 | UNK | 0.0000 |
| 46 | C23 | -5.5149 | -4.4553 | -0.1880 | C.ar | 1 | UNK | 0.0000 |
| 47 | H17 | -7.3083 | -3.5027 | -0.9197 | H    | 1 | UNK | 0.0000 |
| 48 | H18 | -3.6098 | -5.1105 | 0.5843  | H    | 1 | UNK | 0.0000 |
| 49 | H19 | -5.9212 | -5.4597 | -0.2605 | H    | 1 | UNK | 0.0000 |
| 50 | O6  | -2.5703 | 3.4977  | 0.1677  | O.3  | 1 | UNK | 0.0000 |
| 51 | H20 | -2.7505 | 2.5139  | 0.1680  | H    | 1 | UNK | 0.0000 |

@<TRIPOS>BOND

|    |    |       |
|----|----|-------|
| 1  | 1  | 2 1   |
| 2  | 1  | 3 1   |
| 3  | 1  | 16 1  |
| 4  | 1  | 19 1  |
| 5  | 2  | 4 1   |
| 6  | 2  | 5 1   |
| 7  | 2  | 14 1  |
| 8  | 6  | 7 ar  |
| 9  | 6  | 11 ar |
| 10 | 6  | 16 1  |
| 11 | 7  | 8 ar  |
| 12 | 7  | 12 1  |
| 13 | 8  | 9 ar  |
| 14 | 8  | 17 1  |
| 15 | 9  | 10 ar |
| 16 | 9  | 13 1  |
| 17 | 10 | 11 ar |
| 18 | 10 | 50 1  |
| 19 | 11 | 14 1  |
| 20 | 14 | 15 2  |
| 21 | 15 | 35 1  |
| 22 | 17 | 18 1  |
| 23 | 19 | 20 ar |
| 24 | 19 | 21 ar |
| 25 | 20 | 22 ar |
| 26 | 20 | 23 1  |
| 27 | 21 | 24 ar |
| 28 | 21 | 25 1  |
| 29 | 22 | 26 ar |
| 30 | 22 | 28 1  |
| 31 | 24 | 26 ar |

|                       |     |    |         |   |   |     |   |      |  |
|-----------------------|-----|----|---------|---|---|-----|---|------|--|
| 32                    | 24  | 27 | 1       |   |   |     |   |      |  |
| 33                    | 26  | 30 | 1       |   |   |     |   |      |  |
| 34                    | 28  | 29 | 1       |   |   |     |   |      |  |
| 35                    | 30  | 31 | 1       |   |   |     |   |      |  |
| 36                    | 31  | 32 | 1       |   |   |     |   |      |  |
| 37                    | 31  | 33 | 1       |   |   |     |   |      |  |
| 38                    | 31  | 34 | 1       |   |   |     |   |      |  |
| 39                    | 35  | 36 | 1       |   |   |     |   |      |  |
| 40                    | 35  | 37 | am      |   |   |     |   |      |  |
| 41                    | 37  | 38 | 2       |   |   |     |   |      |  |
| 42                    | 37  | 39 | 1       |   |   |     |   |      |  |
| 43                    | 39  | 40 | ar      |   |   |     |   |      |  |
| 44                    | 39  | 41 | ar      |   |   |     |   |      |  |
| 45                    | 40  | 42 | ar      |   |   |     |   |      |  |
| 46                    | 40  | 43 | 1       |   |   |     |   |      |  |
| 47                    | 41  | 44 | ar      |   |   |     |   |      |  |
| 48                    | 41  | 45 | 1       |   |   |     |   |      |  |
| 49                    | 42  | 46 | ar      |   |   |     |   |      |  |
| 50                    | 42  | 47 | 1       |   |   |     |   |      |  |
| 51                    | 44  | 46 | ar      |   |   |     |   |      |  |
| 52                    | 44  | 48 | 1       |   |   |     |   |      |  |
| 53                    | 46  | 49 | 1       |   |   |     |   |      |  |
| 54                    | 50  | 51 | 1       |   |   |     |   |      |  |
| @<TRIPOS>SUBSTRUCTURE |     |    |         |   |   |     |   |      |  |
| 1                     | UNK | 1  | RESIDUE | 4 | A | UNK | 0 | ROOT |  |

---

Table S5.3. [Cu((R)-L<sup>1</sup>H<sub>2</sub><sup>am</sup>)(AcO)] (CuHHSB; CuC<sub>25</sub>N<sub>2</sub>H<sub>22</sub>O<sub>8</sub>)

|                                             |                |
|---------------------------------------------|----------------|
| Electronic Energy, BS1 (a.u.)               | -1874.7512616  |
| Thermal and entropic correction, BS1 (a.u.) | 0.368166       |
| Electronic Energy, BS2 (a.u.)               | -3318.66519038 |

@<TRIPOS>MOLECULE  
CuC25N2H22O8  
58 63 1 0 0  
Cu\_r-HHSB  
NO\_CHARGES

|               |    |         |         |         |     |   |     |        |  |
|---------------|----|---------|---------|---------|-----|---|-----|--------|--|
| @<TRIPOS>ATOM |    |         |         |         |     |   |     |        |  |
| 1             | C1 | -2.3494 | -0.9062 | -0.5479 | C.3 | 1 | UNK | 0.0000 |  |



|    |     |         |         |              |       |        |
|----|-----|---------|---------|--------------|-------|--------|
| 2  | C2  | -1.2889 | 0.0088  | 0.0534 C.3   | 1 UNK | 0.0000 |
| 3  | H1  | -2.0826 | -1.1238 | -1.5897 H    | 1 UNK | 0.0000 |
| 4  | H2  | -1.5930 | 0.3299  | 1.0582 H     | 1 UNK | 0.0000 |
| 5  | H3  | -1.2253 | 0.9009  | -0.5769 H    | 1 UNK | 0.0000 |
| 6  | C3  | -1.1655 | -2.8128 | 0.2388 C.ar  | 1 UNK | 0.0000 |
| 7  | C4  | -1.2478 | -4.1819 | 0.3963 C.ar  | 1 UNK | 0.0000 |
| 8  | C5  | -0.0581 | -4.9231 | 0.4874 C.ar  | 1 UNK | 0.0000 |
| 9  | C6  | 1.1828  | -4.3049 | 0.4091 C.ar  | 1 UNK | 0.0000 |
| 10 | C7  | 1.2919  | -2.9060 | 0.2549 C.ar  | 1 UNK | 0.0000 |
| 11 | C8  | 0.0826  | -2.1128 | 0.1762 C.ar  | 1 UNK | 0.0000 |
| 12 | H4  | -2.2131 | -4.6712 | 0.4350 H     | 1 UNK | 0.0000 |
| 13 | H5  | 2.0964  | -4.8882 | 0.4669 H     | 1 UNK | 0.0000 |
| 14 | C9  | 0.0528  | -0.6773 | 0.1423 C.2   | 1 UNK | 0.0000 |
| 15 | N1  | 1.1574  | 0.0291  | 0.2319 N.pl3 | 1 UNK | 0.0000 |
| 16 | O1  | -2.3654 | -2.1563 | 0.1779 O.3   | 1 UNK | 0.0000 |
| 17 | O2  | -0.1958 | -6.2715 | 0.6385 O.3   | 1 UNK | 0.0000 |
| 18 | H6  | 0.6797  | -6.6875 | 0.6651 H     | 1 UNK | 0.0000 |
| 19 | C10 | -3.7335 | -0.3144 | -0.4856 C.ar | 1 UNK | 0.0000 |
| 20 | C11 | -4.3712 | -0.1543 | 0.7552 C.ar  | 1 UNK | 0.0000 |
| 21 | C12 | -4.3769 | 0.1075  | -1.6478 C.ar | 1 UNK | 0.0000 |
| 22 | C13 | -5.6338 | 0.4165  | 0.8233 C.ar  | 1 UNK | 0.0000 |
| 23 | H7  | -3.8945 | -0.4810 | 1.6739 H     | 1 UNK | 0.0000 |
| 24 | C14 | -5.6478 | 0.6949  | -1.5877 C.ar | 1 UNK | 0.0000 |
| 25 | H8  | -3.8921 | -0.0176 | -2.6114 H    | 1 UNK | 0.0000 |
| 26 | C15 | -6.2801 | 0.8502  | -0.3564 C.ar | 1 UNK | 0.0000 |
| 27 | H9  | -6.1353 | 1.0182  | -2.4995 H    | 1 UNK | 0.0000 |
| 28 | O3  | -6.2478 | 0.5576  | 2.0440 O.3   | 1 UNK | 0.0000 |
| 29 | H10 | -7.1134 | 0.9722  | 1.8953 H     | 1 UNK | 0.0000 |
| 30 | O4  | -7.5196 | 1.3985  | -0.1507 O.3  | 1 UNK | 0.0000 |
| 31 | C16 | -8.2435 | 1.8657  | -1.2938 C.3  | 1 UNK | 0.0000 |
| 32 | H11 | -8.4462 | 1.0471  | -1.9934 H    | 1 UNK | 0.0000 |
| 33 | H12 | -9.1852 | 2.2606  | -0.9106 H    | 1 UNK | 0.0000 |
| 34 | H13 | -7.6942 | 2.6614  | -1.8094 H    | 1 UNK | 0.0000 |
| 35 | O5  | 2.5070  | -2.4118 | 0.1888 O.pl3 | 1 UNK | 0.0000 |
| 36 | N2  | 1.0864  | 1.4100  | 0.2754 N.pl3 | 1 UNK | 0.0000 |
| 37 | H14 | 0.2227  | 1.8731  | 0.5355 H     | 1 UNK | 0.0000 |
| 38 | C17 | 2.2526  | 2.0844  | 0.2469 C.2   | 1 UNK | 0.0000 |
| 39 | O6  | 3.3419  | 1.4463  | 0.1674 O.pl3 | 1 UNK | 0.0000 |
| 40 | C18 | 2.2216  | 3.5581  | 0.3109 C.ar  | 1 UNK | 0.0000 |
| 41 | C19 | 3.3622  | 4.2217  | 0.7909 C.ar  | 1 UNK | 0.0000 |
| 42 | C20 | 1.1048  | 4.2989  | -0.1118 C.ar | 1 UNK | 0.0000 |
| 43 | C21 | 3.3764  | 5.6120  | 0.8673 C.ar  | 1 UNK | 0.0000 |
| 44 | H15 | 4.2217  | 3.6420  | 1.1093 H     | 1 UNK | 0.0000 |
| 45 | C22 | 1.1293  | 5.6900  | -0.0365 C.ar | 1 UNK | 0.0000 |
| 46 | H16 | 0.2332  | 3.8024  | -0.5265 H    | 1 UNK | 0.0000 |
| 47 | C23 | 2.2606  | 6.3473  | 0.4558 C.ar  | 1 UNK | 0.0000 |
| 48 | H17 | 4.2560  | 6.1219  | 1.2474 H     | 1 UNK | 0.0000 |
| 49 | H18 | 0.2690  | 6.2608  | -0.3711 H    | 1 UNK | 0.0000 |
| 50 | H19 | 2.2748  | 7.4315  | 0.5126 H     | 1 UNK | 0.0000 |

|    |     |        |         |         |       |       |        |
|----|-----|--------|---------|---------|-------|-------|--------|
| 51 | C24 | 5.4999 | -0.9170 | -1.0459 | C.2   | 1 UNK | 0.0000 |
| 52 | O7  | 4.8770 | -0.6728 | -2.0987 | O.2   | 1 UNK | 0.0000 |
| 53 | O8  | 4.9510 | -0.9713 | 0.1312  | O.pl3 | 1 UNK | 0.0000 |
| 54 | C25 | 6.9949 | -1.1738 | -1.0626 | C.3   | 1 UNK | 0.0000 |
| 55 | H20 | 7.2087 | -2.1437 | -0.6034 | H     | 1 UNK | 0.0000 |
| 56 | H21 | 7.5024 | -0.4103 | -0.4643 | H     | 1 UNK | 0.0000 |
| 57 | H22 | 7.3818 | -1.1550 | -2.0824 | H     | 1 UNK | 0.0000 |
| 58 | Cu1 | 3.0393 | -0.5654 | 0.1622  | M.Cu  | 1 UNK | 0.0000 |

@<TRIPOS>BOND

|    |    |       |
|----|----|-------|
| 1  | 1  | 2 1   |
| 2  | 1  | 3 1   |
| 3  | 1  | 16 1  |
| 4  | 1  | 19 1  |
| 5  | 2  | 4 1   |
| 6  | 2  | 5 1   |
| 7  | 2  | 14 1  |
| 8  | 6  | 7 ar  |
| 9  | 6  | 11 ar |
| 10 | 6  | 16 1  |
| 11 | 7  | 8 ar  |
| 12 | 7  | 12 1  |
| 13 | 8  | 9 ar  |
| 14 | 8  | 17 1  |
| 15 | 9  | 10 ar |
| 16 | 9  | 13 1  |
| 17 | 10 | 11 ar |
| 18 | 10 | 35 1  |
| 19 | 11 | 14 1  |
| 20 | 14 | 15 2  |
| 21 | 15 | 36 2  |
| 22 | 17 | 18 1  |
| 23 | 19 | 20 ar |
| 24 | 19 | 21 ar |
| 25 | 20 | 22 ar |
| 26 | 20 | 23 1  |
| 27 | 21 | 24 ar |
| 28 | 21 | 25 1  |
| 29 | 22 | 26 ar |
| 30 | 22 | 28 1  |
| 31 | 24 | 26 ar |
| 32 | 24 | 27 1  |
| 33 | 26 | 30 1  |
| 34 | 28 | 29 1  |
| 35 | 30 | 31 1  |
| 36 | 31 | 32 1  |
| 37 | 31 | 33 1  |
| 38 | 31 | 34 1  |
| 39 | 36 | 37 1  |
| 40 | 36 | 38 2  |

```

41  38  39 1
42  38  40 1
43  40  41 ar
44  40  42 ar
45  41  43 ar
46  41  44 1
47  42  45 ar
48  42  46 1
49  43  47 ar
50  43  48 1
51  45  47 ar
52  45  49 1
53  47  50 1
54  51  52 2
55  51  53 1
56  51  54 1
57  54  55 1
58  54  56 1
59  54  57 1
60  15  58 1
61  35  58 1
62  39  58 1
63  53  58 1

```

@<TRIPOS>SUBSTRUCTURE

```

1 UNK      1 RESIDUE      4 A      UNK      0 ROOT

```

---

Table S5.4. [Cu((S)-L<sup>1</sup>H<sub>2</sub><sup>am</sup>)(AcO)] (CuHHSB; CuC<sub>25</sub>N<sub>2</sub>H<sub>22</sub>O<sub>8</sub>)

|                                             |                |
|---------------------------------------------|----------------|
| Electronic Energy, BS1 (a.u.)               | -1874.7512616  |
| Thermal and entropic correction, BS1 (a.u.) | 0.368166       |
| Electronic Energy, BS2 (a.u.)               | -3318.66519038 |

@<TRIPOS>MOLECULE

CuC<sub>25</sub>N<sub>2</sub>H<sub>22</sub>O<sub>8</sub>

58 63 1 0 0

Cu\_s-HHSB

NO\_CHARGES

@<TRIPOS>ATOM

```

1 C1      -2.3494   -0.9062    0.5479 C.3      1 UNK      0.0000

```

|    |     |         |         |                |       |        |
|----|-----|---------|---------|----------------|-------|--------|
| 2  | C2  | -1.2889 | 0.0088  | -0.0534 C.3    | 1 UNK | 0.0000 |
| 3  | H1  | -2.0826 | -1.1238 | 1.5897 H       | 1 UNK | 0.0000 |
| 4  | H2  | -1.5930 | 0.3299  | -1.0582 H      | 1 UNK | 0.0000 |
| 5  | H3  | -1.2253 | 0.9009  | 0.5769 H       | 1 UNK | 0.0000 |
| 6  | C3  | -1.1655 | -2.8128 | -0.2388 C.ar   | 1 UNK | 0.0000 |
| 7  | C4  | -1.2478 | -4.1819 | -0.3963 C.ar   | 1 UNK | 0.0000 |
| 8  | C5  | -0.0581 | -4.9231 | -0.4874 C.ar   | 1 UNK | 0.0000 |
| 9  | C6  | 1.1828  | -4.3049 | -0.4091 C.ar   | 1 UNK | 0.0000 |
| 10 | C7  | 1.2919  | -2.9060 | -0.2549 C.ar   | 1 UNK | 0.0000 |
| 11 | C8  | 0.0826  | -2.1128 | -0.1762 C.ar   | 1 UNK | 0.0000 |
| 12 | H4  | -2.2131 | -4.6712 | -0.4350 H      | 1 UNK | 0.0000 |
| 13 | H5  | 2.0964  | -4.8882 | -0.4669 H      | 1 UNK | 0.0000 |
| 14 | C9  | 0.0528  | -0.6773 | -0.1423 C.2    | 1 UNK | 0.0000 |
| 15 | N1  | 1.1574  | 0.0291  | -0.2319 N.pl3  | 1 UNK | 0.0000 |
| 16 | O1  | -2.3654 | -2.1563 | -0.1779 O.3    | 1 UNK | 0.0000 |
| 17 | O2  | -0.1958 | -6.2715 | -0.6385 O.3    | 1 UNK | 0.0000 |
| 18 | H6  | 0.6797  | -6.6875 | -0.6651 H      | 1 UNK | 0.0000 |
| 19 | C10 | -3.7335 | -0.3144 | 0.4856 C.ar    | 1 UNK | 0.0000 |
| 20 | C11 | -4.3712 | -0.1543 | -0.7552 C.ar   | 1 UNK | 0.0000 |
| 21 | C12 | -4.3769 | 0.1075  | 1.6478 C.ar    | 1 UNK | 0.0000 |
| 22 | C13 | -5.6338 | 0.4165  | -0.8233 C.ar   | 1 UNK | 0.0000 |
| 23 | H7  | -3.8945 | -0.4810 | -1.6739 H      | 1 UNK | 0.0000 |
| 24 | C14 | -5.6478 | 0.6949  | 1.5877 C.ar    | 1 UNK | 0.0000 |
| 25 | H8  | -3.8921 | -0.0176 | 2.6114 H       | 1 UNK | 0.0000 |
| 26 | C15 | -6.2801 | 0.8502  | 0.3564 C.ar    | 1 UNK | 0.0000 |
| 27 | H9  | -6.1353 | 1.0182  | 2.4995 H       | 1 UNK | 0.0000 |
| 28 | O3  | -6.2478 | 0.5576  | -2.0440 O.3    | 1 UNK | 0.0000 |
| 29 | H10 | -7.1134 | 0.9722  | -1.8953 H      | 1 UNK | 0.0000 |
| 30 | O4  | -7.5196 | 1.3985  | 0.1507 O.3     | 1 UNK | 0.0000 |
| 31 | C16 | -8.2435 | 1.8657  | 1.2938 C.3     | 1 UNK | 0.0000 |
| 32 | H11 | -8.4462 | 1.0471  | 1.9934 H       | 1 UNK | 0.0000 |
| 33 | H12 | -9.1852 | 2.2606  | 0.9106 H       | 1 UNK | 0.0000 |
| 34 | H13 | -7.6942 | 2.6614  | 1.8094 H       | 1 UNK | 0.0000 |
| 35 | O5  | 2.5070  | -2.4118 | -0.1888 O.2cor | 1 UNK | 0.0000 |
| 36 | N2  | 1.0864  | 1.4100  | -0.2754 N.am   | 1 UNK | 0.0000 |
| 37 | H14 | 0.2227  | 1.8731  | -0.5355 H      | 1 UNK | 0.0000 |
| 38 | C17 | 2.2526  | 2.0844  | -0.2469 C.2    | 1 UNK | 0.0000 |
| 39 | O6  | 3.3419  | 1.4463  | -0.1674 O.2cor | 1 UNK | 0.0000 |
| 40 | C18 | 2.2216  | 3.5581  | -0.3109 C.ar   | 1 UNK | 0.0000 |
| 41 | C19 | 3.3622  | 4.2217  | -0.7909 C.ar   | 1 UNK | 0.0000 |
| 42 | C20 | 1.1048  | 4.2989  | 0.1118 C.ar    | 1 UNK | 0.0000 |
| 43 | C21 | 3.3764  | 5.6120  | -0.8673 C.ar   | 1 UNK | 0.0000 |
| 44 | H15 | 4.2217  | 3.6420  | -1.1093 H      | 1 UNK | 0.0000 |
| 45 | C22 | 1.1293  | 5.6900  | 0.0365 C.ar    | 1 UNK | 0.0000 |
| 46 | H16 | 0.2332  | 3.8024  | 0.5265 H       | 1 UNK | 0.0000 |
| 47 | C23 | 2.2606  | 6.3473  | -0.4558 C.ar   | 1 UNK | 0.0000 |
| 48 | H17 | 4.2560  | 6.1219  | -1.2474 H      | 1 UNK | 0.0000 |
| 49 | H18 | 0.2690  | 6.2608  | 0.3711 H       | 1 UNK | 0.0000 |
| 50 | H19 | 2.2748  | 7.4315  | -0.5126 H      | 1 UNK | 0.0000 |

|    |     |        |         |         |        |       |        |
|----|-----|--------|---------|---------|--------|-------|--------|
| 51 | C24 | 5.4999 | -0.9170 | 1.0459  | C.2    | 1 UNK | 0.0000 |
| 52 | O7  | 4.8770 | -0.6728 | 2.0987  | O.2    | 1 UNK | 0.0000 |
| 53 | O8  | 4.9510 | -0.9713 | -0.1312 | O.2cor | 1 UNK | 0.0000 |
| 54 | C25 | 6.9949 | -1.1738 | 1.0626  | C.3    | 1 UNK | 0.0000 |
| 55 | H20 | 7.2087 | -2.1437 | 0.6034  | H      | 1 UNK | 0.0000 |
| 56 | H21 | 7.5024 | -0.4103 | 0.4643  | H      | 1 UNK | 0.0000 |
| 57 | H22 | 7.3818 | -1.1550 | 2.0824  | H      | 1 UNK | 0.0000 |
| 58 | Cu1 | 3.0393 | -0.5654 | -0.1622 | M.Cu   | 1 UNK | 0.0000 |

@<TRIPOS>BOND

|    |    |       |
|----|----|-------|
| 1  | 1  | 2 1   |
| 2  | 1  | 3 1   |
| 3  | 1  | 16 1  |
| 4  | 1  | 19 1  |
| 5  | 2  | 4 1   |
| 6  | 2  | 5 1   |
| 7  | 2  | 14 1  |
| 8  | 6  | 7 ar  |
| 9  | 6  | 11 ar |
| 10 | 6  | 16 1  |
| 11 | 7  | 8 ar  |
| 12 | 7  | 12 1  |
| 13 | 8  | 9 ar  |
| 14 | 8  | 17 1  |
| 15 | 9  | 10 ar |
| 16 | 9  | 13 1  |
| 17 | 10 | 11 ar |
| 18 | 10 | 35 1  |
| 19 | 11 | 14 1  |
| 20 | 14 | 15 2  |
| 21 | 15 | 36 1  |
| 22 | 17 | 18 1  |
| 23 | 19 | 20 ar |
| 24 | 19 | 21 ar |
| 25 | 20 | 22 ar |
| 26 | 20 | 23 1  |
| 27 | 21 | 24 ar |
| 28 | 21 | 25 1  |
| 29 | 22 | 26 ar |
| 30 | 22 | 28 1  |
| 31 | 24 | 26 ar |
| 32 | 24 | 27 1  |
| 33 | 26 | 30 1  |
| 34 | 28 | 29 1  |
| 35 | 30 | 31 1  |
| 36 | 31 | 32 1  |
| 37 | 31 | 33 1  |
| 38 | 31 | 34 1  |
| 39 | 36 | 37 1  |
| 40 | 36 | 38 am |

```

41  38  39 2
42  38  40 1
43  40  41 ar
44  40  42 ar
45  41  43 ar
46  41  44 1
47  42  45 ar
48  42  46 1
49  43  47 ar
50  43  48 1
51  45  47 ar
52  45  49 1
53  47  50 1
54  51  52 2
55  51  53 2
56  51  54 1
57  54  55 1
58  54  56 1
59  54  57 1
60  58  39 1
61  58  15 1
62  58  35 1
63  58  53 1

```

@<TRIPOS>SUBSTRUCTURE

```

1 UNK      1 RESIDUE      4 A      UNK      0 ROOT

```

---

Table S5.5.  $[\text{Cu}((R)\text{-L}^1\text{H}_2^{\text{am}})(\text{H}_2\text{O})]^+$  ( $\text{CuC}_{23}\text{N}_2\text{H}_{21}\text{O}_7^+$ )

|                                             |   |                |
|---------------------------------------------|---|----------------|
| Electronic Energy, BS1 (a.u.)               | = | -1722.54133998 |
| Thermal and entropic correction, BS1 (a.u.) | = | 0.348554       |
| Electronic Energy, BS2 (a.u.)               | = | -3166.3895989  |

@<TRIPOS>MOLECULE

CuC23N2H21O7

54 59 1 0 0

Cu\_r-HHSB\_wat

NO\_CHARGES

@<TRIPOS>ATOM

```

1 C1      -1.9850   -0.7649   -0.5372 C.3      1 UNK      0.0000

```

|    |     |         |         |                |       |        |
|----|-----|---------|---------|----------------|-------|--------|
| 2  | C2  | -0.8245 | 0.0160  | 0.0697 C.3     | 1 UNK | 0.0000 |
| 3  | H1  | -1.7669 | -0.9585 | -1.5951 H      | 1 UNK | 0.0000 |
| 4  | H2  | -1.0520 | 0.2812  | 1.1102 H       | 1 UNK | 0.0000 |
| 5  | H3  | -0.7098 | 0.9451  | -0.4957 H      | 1 UNK | 0.0000 |
| 6  | C3  | -0.9617 | -2.8064 | 0.1260 C.ar    | 1 UNK | 0.0000 |
| 7  | C4  | -1.1610 | -4.1658 | 0.2655 C.ar    | 1 UNK | 0.0000 |
| 8  | C5  | -0.0413 | -5.0137 | 0.2738 C.ar    | 1 UNK | 0.0000 |
| 9  | C6  | 1.2451  | -4.5107 | 0.1188 C.ar    | 1 UNK | 0.0000 |
| 10 | C7  | 1.4722  | -3.1276 | -0.0219 C.ar   | 1 UNK | 0.0000 |
| 11 | C8  | 0.3417  | -2.2240 | 0.0065 C.ar    | 1 UNK | 0.0000 |
| 12 | H4  | -2.1635 | -4.5657 | 0.3532 H       | 1 UNK | 0.0000 |
| 13 | H5  | 2.1010  | -5.1780 | 0.1032 H       | 1 UNK | 0.0000 |
| 14 | C9  | 0.4476  | -0.7933 | 0.0314 C.2     | 1 UNK | 0.0000 |
| 15 | N1  | 1.6193  | -0.2007 | 0.0649 N.pl3   | 1 UNK | 0.0000 |
| 16 | O1  | -2.0950 | -2.0403 | 0.1351 O.3     | 1 UNK | 0.0000 |
| 17 | O2  | -0.2892 | -6.3457 | 0.4198 O.3     | 1 UNK | 0.0000 |
| 18 | H6  | 0.5472  | -6.8372 | 0.4064 H       | 1 UNK | 0.0000 |
| 19 | C10 | -3.3028 | -0.0468 | -0.4110 C.ar   | 1 UNK | 0.0000 |
| 20 | C11 | -3.9266 | 0.0694  | 0.8414 C.ar    | 1 UNK | 0.0000 |
| 21 | C12 | -3.8888 | 0.5458  | -1.5285 C.ar   | 1 UNK | 0.0000 |
| 22 | C13 | -5.1211 | 0.7651  | 0.9643 C.ar    | 1 UNK | 0.0000 |
| 23 | H7  | -3.4939 | -0.3891 | 1.7246 H       | 1 UNK | 0.0000 |
| 24 | C14 | -5.0871 | 1.2620  | -1.4110 C.ar   | 1 UNK | 0.0000 |
| 25 | H8  | -3.4149 | 0.4557  | -2.5013 H      | 1 UNK | 0.0000 |
| 26 | C15 | -5.7066 | 1.3745  | -0.1686 C.ar   | 1 UNK | 0.0000 |
| 27 | H9  | -5.5289 | 1.7186  | -2.2884 H      | 1 UNK | 0.0000 |
| 28 | O3  | -5.7256 | 0.8571  | 2.1943 O.3     | 1 UNK | 0.0000 |
| 29 | H10 | -6.5494 | 1.3598  | 2.0854 H       | 1 UNK | 0.0000 |
| 30 | O4  | -6.8780 | 2.0381  | 0.0900 O.3     | 1 UNK | 0.0000 |
| 31 | C16 | -7.5428 | 2.6779  | -1.0043 C.3    | 1 UNK | 0.0000 |
| 32 | H11 | -7.8303 | 1.9497  | -1.7710 H      | 1 UNK | 0.0000 |
| 33 | H12 | -8.4374 | 3.1377  | -0.5830 H      | 1 UNK | 0.0000 |
| 34 | H13 | -6.9089 | 3.4512  | -1.4527 H      | 1 UNK | 0.0000 |
| 35 | O5  | 2.7228  | -2.7466 | -0.1772 O.2cor | 1 UNK | 0.0000 |
| 36 | N2  | 1.7007  | 1.1766  | 0.1557 N.am    | 1 UNK | 0.0000 |
| 37 | H14 | 0.9211  | 1.7112  | 0.5221 H       | 1 UNK | 0.0000 |
| 38 | C17 | 2.9195  | 1.7252  | -0.0073 C.2    | 1 UNK | 0.0000 |
| 39 | O6  | 3.9111  | 0.9756  | -0.2588 O.2cor | 1 UNK | 0.0000 |
| 40 | C18 | 3.0730  | 3.1860  | 0.1183 C.ar    | 1 UNK | 0.0000 |
| 41 | C19 | 4.3448  | 3.6878  | 0.4396 C.ar    | 1 UNK | 0.0000 |
| 42 | C20 | 2.0006  | 4.0713  | -0.0859 C.ar   | 1 UNK | 0.0000 |
| 43 | C21 | 4.5366  | 5.0603  | 0.5740 C.ar    | 1 UNK | 0.0000 |
| 44 | H15 | 5.1672  | 2.9976  | 0.5925 H       | 1 UNK | 0.0000 |
| 45 | C22 | 2.2027  | 5.4433  | 0.0459 C.ar    | 1 UNK | 0.0000 |
| 46 | H16 | 1.0212  | 3.7024  | -0.3739 H      | 1 UNK | 0.0000 |
| 47 | C23 | 3.4668  | 5.9390  | 0.3789 C.ar    | 1 UNK | 0.0000 |
| 48 | H17 | 5.5185  | 5.4445  | 0.8316 H       | 1 UNK | 0.0000 |
| 49 | H18 | 1.3754  | 6.1259  | -0.1199 H      | 1 UNK | 0.0000 |
| 50 | H19 | 3.6189  | 7.0092  | 0.4811 H       | 1 UNK | 0.0000 |

|    |     |        |         |         |       |   |     |        |
|----|-----|--------|---------|---------|-------|---|-----|--------|
| 51 | Cu1 | 3.4034 | -0.9714 | -0.2334 | M.Cu  | 1 | UNK | 0.0000 |
| 52 | O7  | 5.3075 | -1.6690 | -0.4492 | O.H2O | 1 | UNK | 0.0000 |
| 53 | H20 | 5.7476 | -1.2004 | -1.1767 | H     | 1 | UNK | 0.0000 |
| 54 | H21 | 5.2618 | -2.5973 | -0.7306 | H     | 1 | UNK | 0.0000 |

@<TRIPOS>BOND

|    |    |    |    |
|----|----|----|----|
| 1  | 1  | 2  | 1  |
| 2  | 1  | 3  | 1  |
| 3  | 1  | 16 | 1  |
| 4  | 1  | 19 | 1  |
| 5  | 2  | 4  | 1  |
| 6  | 2  | 5  | 1  |
| 7  | 2  | 14 | 1  |
| 8  | 6  | 7  | ar |
| 9  | 6  | 11 | ar |
| 10 | 6  | 16 | 1  |
| 11 | 7  | 8  | ar |
| 12 | 7  | 12 | 1  |
| 13 | 8  | 9  | ar |
| 14 | 8  | 17 | 1  |
| 15 | 9  | 10 | ar |
| 16 | 9  | 13 | 1  |
| 17 | 10 | 11 | ar |
| 18 | 10 | 35 | 1  |
| 19 | 11 | 14 | 1  |
| 20 | 14 | 15 | 2  |
| 21 | 15 | 36 | 1  |
| 22 | 17 | 18 | 1  |
| 23 | 19 | 20 | ar |
| 24 | 19 | 21 | ar |
| 25 | 20 | 22 | ar |
| 26 | 20 | 23 | 1  |
| 27 | 21 | 24 | ar |
| 28 | 21 | 25 | 1  |
| 29 | 22 | 26 | ar |
| 30 | 22 | 28 | 1  |
| 31 | 24 | 26 | ar |
| 32 | 24 | 27 | 1  |
| 33 | 26 | 30 | 1  |
| 34 | 28 | 29 | 1  |
| 35 | 30 | 31 | 1  |
| 36 | 31 | 32 | 1  |
| 37 | 31 | 33 | 1  |
| 38 | 31 | 34 | 1  |
| 39 | 36 | 37 | 1  |
| 40 | 36 | 38 | am |
| 41 | 38 | 39 | 2  |
| 42 | 38 | 40 | 1  |
| 43 | 40 | 41 | ar |
| 44 | 40 | 42 | ar |



```

45  41  43 ar
46  41  44 1
47  42  45 ar
48  42  46 1
49  43  47 ar
50  43  48 1
51  45  47 ar
52  45  49 1
53  47  50 1
54  52  53 1
55  52  54 1
56  51  39 1
57  51  35 1
58  51  52 1
59  51  15 1
@<TRIPOS>SUBSTRUCTURE
      1 UNK      1 RESIDUE      4 A      UNK      0 ROOT

```

---

Table S5.6.  $[\text{Cu}((\text{S})\text{-L}^1\text{H}_2^{\text{am}})(\text{H}_2\text{O})]^+$  ( $\text{CuC}_{23}\text{N}_2\text{H}_{21}\text{O}_7^+$ )

|                                             |   |                |
|---------------------------------------------|---|----------------|
| Electronic Energy, BS1 (a.u.)               | = | -1722.54133998 |
| Thermal and entropic correction, BS1 (a.u.) | = | 0.348554       |
| Electronic Energy, BS2 (a.u.)               | = | -3166.3895989  |

```

@<TRIPOS>MOLECULE
CuC23N2H21O7
54 59 1 0 0
Cu_s-HHSB_wat
NO_CHARGES

```

```

@<TRIPOS>ATOM
      1 C1      -1.9850      -0.7649      0.5372 C.3      1 UNK      0.0000
      2 C2      -0.8245      0.0160     -0.0697 C.3      1 UNK      0.0000
      3 H1      -1.7669     -0.9585      1.5951 H      1 UNK      0.0000
      4 H2      -1.0520      0.2812     -1.1102 H      1 UNK      0.0000
      5 H3      -0.7098      0.9451      0.4957 H      1 UNK      0.0000
      6 C3      -0.9617     -2.8064     -0.1260 C.ar     1 UNK      0.0000
      7 C4      -1.1610     -4.1658     -0.2655 C.ar     1 UNK      0.0000
      8 C5      -0.0413     -5.0137     -0.2738 C.ar     1 UNK      0.0000
      9 C6       1.2451     -4.5107     -0.1188 C.ar     1 UNK      0.0000

```

|    |     |         |         |               |       |        |
|----|-----|---------|---------|---------------|-------|--------|
| 10 | C7  | 1.4722  | -3.1276 | 0.0219 C.ar   | 1 UNK | 0.0000 |
| 11 | C8  | 0.3417  | -2.2240 | -0.0065 C.ar  | 1 UNK | 0.0000 |
| 12 | H4  | -2.1635 | -4.5657 | -0.3532 H     | 1 UNK | 0.0000 |
| 13 | H5  | 2.1010  | -5.1780 | -0.1032 H     | 1 UNK | 0.0000 |
| 14 | C9  | 0.4476  | -0.7933 | -0.0314 C.2   | 1 UNK | 0.0000 |
| 15 | N1  | 1.6193  | -0.2007 | -0.0649 N.pl3 | 1 UNK | 0.0000 |
| 16 | O1  | -2.0950 | -2.0403 | -0.1351 O.3   | 1 UNK | 0.0000 |
| 17 | O2  | -0.2892 | -6.3457 | -0.4198 O.3   | 1 UNK | 0.0000 |
| 18 | H6  | 0.5472  | -6.8372 | -0.4064 H     | 1 UNK | 0.0000 |
| 19 | C10 | -3.3028 | -0.0468 | 0.4110 C.ar   | 1 UNK | 0.0000 |
| 20 | C11 | -3.9266 | 0.0694  | -0.8414 C.ar  | 1 UNK | 0.0000 |
| 21 | C12 | -3.8888 | 0.5458  | 1.5285 C.ar   | 1 UNK | 0.0000 |
| 22 | C13 | -5.1211 | 0.7651  | -0.9643 C.ar  | 1 UNK | 0.0000 |
| 23 | H7  | -3.4939 | -0.3891 | -1.7246 H     | 1 UNK | 0.0000 |
| 24 | C14 | -5.0871 | 1.2620  | 1.4110 C.ar   | 1 UNK | 0.0000 |
| 25 | H8  | -3.4149 | 0.4557  | 2.5013 H      | 1 UNK | 0.0000 |
| 26 | C15 | -5.7066 | 1.3745  | 0.1686 C.ar   | 1 UNK | 0.0000 |
| 27 | H9  | -5.5289 | 1.7186  | 2.2884 H      | 1 UNK | 0.0000 |
| 28 | O3  | -5.7256 | 0.8571  | -2.1943 O.3   | 1 UNK | 0.0000 |
| 29 | H10 | -6.5494 | 1.3598  | -2.0854 H     | 1 UNK | 0.0000 |
| 30 | O4  | -6.8780 | 2.0381  | -0.0900 O.3   | 1 UNK | 0.0000 |
| 31 | C16 | -7.5428 | 2.6779  | 1.0043 C.3    | 1 UNK | 0.0000 |
| 32 | H11 | -7.8303 | 1.9497  | 1.7710 H      | 1 UNK | 0.0000 |
| 33 | H12 | -8.4374 | 3.1377  | 0.5830 H      | 1 UNK | 0.0000 |
| 34 | H13 | -6.9089 | 3.4512  | 1.4527 H      | 1 UNK | 0.0000 |
| 35 | O5  | 2.7228  | -2.7466 | 0.1772 O.2cor | 1 UNK | 0.0000 |
| 36 | N2  | 1.7007  | 1.1766  | -0.1557 N.am  | 1 UNK | 0.0000 |
| 37 | H14 | 0.9211  | 1.7112  | -0.5221 H     | 1 UNK | 0.0000 |
| 38 | C17 | 2.9195  | 1.7252  | 0.0073 C.2    | 1 UNK | 0.0000 |
| 39 | O6  | 3.9112  | 0.9756  | 0.2588 O.2cor | 1 UNK | 0.0000 |
| 40 | C18 | 3.0730  | 3.1860  | -0.1183 C.ar  | 1 UNK | 0.0000 |
| 41 | C19 | 4.3448  | 3.6878  | -0.4396 C.ar  | 1 UNK | 0.0000 |
| 42 | C20 | 2.0006  | 4.0713  | 0.0859 C.ar   | 1 UNK | 0.0000 |
| 43 | C21 | 4.5366  | 5.0603  | -0.5740 C.ar  | 1 UNK | 0.0000 |
| 44 | H15 | 5.1672  | 2.9976  | -0.5925 H     | 1 UNK | 0.0000 |
| 45 | C22 | 2.2027  | 5.4433  | -0.0459 C.ar  | 1 UNK | 0.0000 |
| 46 | H16 | 1.0212  | 3.7024  | 0.3739 H      | 1 UNK | 0.0000 |
| 47 | C23 | 3.4668  | 5.9390  | -0.3789 C.ar  | 1 UNK | 0.0000 |
| 48 | H17 | 5.5185  | 5.4445  | -0.8316 H     | 1 UNK | 0.0000 |
| 49 | H18 | 1.3754  | 6.1259  | 0.1199 H      | 1 UNK | 0.0000 |
| 50 | H19 | 3.6189  | 7.0092  | -0.4811 H     | 1 UNK | 0.0000 |
| 51 | Cu1 | 3.4034  | -0.9714 | 0.2334 M.Cu   | 1 UNK | 0.0000 |
| 52 | O7  | 5.3075  | -1.6690 | 0.4492 O.H2O  | 1 UNK | 0.0000 |
| 53 | H20 | 5.7476  | -1.2004 | 1.1767 H      | 1 UNK | 0.0000 |
| 54 | H21 | 5.2618  | -2.5973 | 0.7306 H      | 1 UNK | 0.0000 |

@<TRIPOS>BOND

|   |   |    |   |
|---|---|----|---|
| 1 | 1 | 2  | 1 |
| 2 | 1 | 3  | 1 |
| 3 | 1 | 16 | 1 |

|    |    |    |    |
|----|----|----|----|
| 4  | 1  | 19 | 1  |
| 5  | 2  | 4  | 1  |
| 6  | 2  | 5  | 1  |
| 7  | 2  | 14 | 1  |
| 8  | 6  | 7  | ar |
| 9  | 6  | 11 | ar |
| 10 | 6  | 16 | 1  |
| 11 | 7  | 8  | ar |
| 12 | 7  | 12 | 1  |
| 13 | 8  | 9  | ar |
| 14 | 8  | 17 | 1  |
| 15 | 9  | 10 | ar |
| 16 | 9  | 13 | 1  |
| 17 | 10 | 11 | ar |
| 18 | 10 | 35 | 1  |
| 19 | 11 | 14 | 1  |
| 20 | 14 | 15 | 2  |
| 21 | 15 | 36 | 1  |
| 22 | 17 | 18 | 1  |
| 23 | 19 | 20 | ar |
| 24 | 19 | 21 | ar |
| 25 | 20 | 22 | ar |
| 26 | 20 | 23 | 1  |
| 27 | 21 | 24 | ar |
| 28 | 21 | 25 | 1  |
| 29 | 22 | 26 | ar |
| 30 | 22 | 28 | 1  |
| 31 | 24 | 26 | ar |
| 32 | 24 | 27 | 1  |
| 33 | 26 | 30 | 1  |
| 34 | 28 | 29 | 1  |
| 35 | 30 | 31 | 1  |
| 36 | 31 | 32 | 1  |
| 37 | 31 | 33 | 1  |
| 38 | 31 | 34 | 1  |
| 39 | 36 | 37 | 1  |
| 40 | 36 | 38 | am |
| 41 | 38 | 39 | 2  |
| 42 | 38 | 40 | 1  |
| 43 | 40 | 41 | ar |
| 44 | 40 | 42 | ar |
| 45 | 41 | 43 | ar |
| 46 | 41 | 44 | 1  |
| 47 | 42 | 45 | ar |
| 48 | 42 | 46 | 1  |
| 49 | 43 | 47 | ar |
| 50 | 43 | 48 | 1  |
| 51 | 45 | 47 | ar |
| 52 | 45 | 49 | 1  |

```

53  47  50  1
54  52  53  1
55  52  54  1
56  51  35  1
57  51  52  1
58  51  15  1
59  51  39  1

```

@<TRIPOS>SUBSTRUCTURE

```

1 UNK      1 RESIDUE      4 A      UNK      0 ROOT

```

---

Table S5.7. [Cu((R)-L<sup>2</sup>H<sub>2</sub><sup>am</sup>)(AcO)] (CuHIN, CuC<sub>24</sub>N<sub>3</sub>H<sub>21</sub>O<sub>8</sub>)

Electronic Energy, BS1 (a.u.) -1890.78523384

Thermal and entropic correction, BS1 (a.u.) 0.356107

@<TRIPOS>MOLECULE

CuC<sub>24</sub>N<sub>3</sub>H<sub>21</sub>O<sub>8</sub>

57 62 1 0 0

CuHIN

NO\_CHARGES

@<TRIPOS>ATOM

|    |     |         |         |         |       |       |        |
|----|-----|---------|---------|---------|-------|-------|--------|
| 1  | C1  | 2.3494  | -0.9091 | 0.5524  | C.3   | 1 UNK | 0.0000 |
| 2  | C2  | 1.2881  | 0.0074  | -0.0450 | C.3   | 1 UNK | 0.0000 |
| 3  | H1  | 2.0849  | -1.1282 | 1.5945  | H     | 1 UNK | 0.0000 |
| 4  | H2  | 1.5907  | 0.3321  | -1.0491 | H     | 1 UNK | 0.0000 |
| 5  | H3  | 1.2264  | 0.8968  | 0.5893  | H     | 1 UNK | 0.0000 |
| 6  | C3  | 1.1628  | -2.8133 | -0.2357 | C.ar  | 1 UNK | 0.0000 |
| 7  | C4  | 1.2427  | -4.1817 | -0.3954 | C.ar  | 1 UNK | 0.0000 |
| 8  | C5  | 0.0516  | -4.9215 | -0.4866 | C.ar  | 1 UNK | 0.0000 |
| 9  | C6  | -1.1886 | -4.3023 | -0.4067 | C.ar  | 1 UNK | 0.0000 |
| 10 | C7  | -1.2962 | -2.9038 | -0.2504 | C.ar  | 1 UNK | 0.0000 |
| 11 | C8  | -0.0853 | -2.1115 | -0.1714 | C.ar  | 1 UNK | 0.0000 |
| 12 | H4  | 2.2072  | -4.6725 | -0.4358 | H     | 1 UNK | 0.0000 |
| 13 | H5  | -2.1027 | -4.8847 | -0.4642 | H     | 1 UNK | 0.0000 |
| 14 | C9  | -0.0537 | -0.6779 | -0.1360 | C.2   | 1 UNK | 0.0000 |
| 15 | N1  | -1.1589 | 0.0300  | -0.2262 | N.pl3 | 1 UNK | 0.0000 |
| 16 | O1  | 2.3629  | -2.1583 | -0.1752 | O.3   | 1 UNK | 0.0000 |
| 17 | O2  | 0.1882  | -6.2691 | -0.6393 | O.3   | 1 UNK | 0.0000 |
| 18 | H6  | -0.6874 | -6.6850 | -0.6657 | H     | 1 UNK | 0.0000 |
| 19 | C10 | 3.7336  | -0.3181 | 0.4874  | C.ar  | 1 UNK | 0.0000 |
| 20 | C11 | 4.3682  | -0.1569 | -0.7549 | C.ar  | 1 UNK | 0.0000 |
| 21 | C12 | 4.3802  | 0.1020  | 1.6485  | C.ar  | 1 UNK | 0.0000 |
| 22 | C13 | 5.6310  | 0.4131  | -0.8256 | C.ar  | 1 UNK | 0.0000 |
| 23 | H7  | 3.8889  | -0.4821 | -1.6727 | H     | 1 UNK | 0.0000 |
| 24 | C14 | 5.6514  | 0.6886  | 1.5857  | C.ar  | 1 UNK | 0.0000 |

|    |     |         |         |                |       |        |
|----|-----|---------|---------|----------------|-------|--------|
| 25 | H8  | 3.8977  | -0.0240 | 2.6131 H       | 1 UNK | 0.0000 |
| 26 | C15 | 6.2805  | 0.8450  | 0.3530 C.ar    | 1 UNK | 0.0000 |
| 27 | H9  | 6.1414  | 1.0105  | 2.4967 H       | 1 UNK | 0.0000 |
| 28 | O3  | 6.2418  | 0.5553  | -2.0477 O.3    | 1 UNK | 0.0000 |
| 29 | H10 | 7.1082  | 0.9691  | -1.9008 H      | 1 UNK | 0.0000 |
| 30 | O4  | 7.5198  | 1.3927  | 0.1447 O.3     | 1 UNK | 0.0000 |
| 31 | C16 | 8.2472  | 1.8580  | 1.2863 C.3     | 1 UNK | 0.0000 |
| 32 | H11 | 8.4513  | 1.0383  | 1.9843 H       | 1 UNK | 0.0000 |
| 33 | H12 | 9.1881  | 2.2526  | 0.9010 H       | 1 UNK | 0.0000 |
| 34 | H13 | 7.6999  | 2.6534  | 1.8045 H       | 1 UNK | 0.0000 |
| 35 | O5  | -2.5100 | -2.4087 | -0.1815 O.2cor | 1 UNK | 0.0000 |
| 36 | N2  | -1.0859 | 1.4104  | -0.2664 N.pl3  | 1 UNK | 0.0000 |
| 37 | H14 | -0.2154 | 1.8783  | -0.4960 H      | 1 UNK | 0.0000 |
| 38 | C17 | -2.2494 | 2.0814  | -0.2456 C.2    | 1 UNK | 0.0000 |
| 39 | O6  | -3.3434 | 1.4565  | -0.1720 O.2cor | 1 UNK | 0.0000 |
| 40 | C18 | -2.2116 | 3.5607  | -0.3128 C.ar   | 1 UNK | 0.0000 |
| 41 | C19 | -3.3224 | 4.2385  | -0.8259 C.ar   | 1 UNK | 0.0000 |
| 42 | C20 | -1.1195 | 4.3096  | 0.1404 C.ar    | 1 UNK | 0.0000 |
| 43 | C21 | -3.2814 | 5.6290  | -0.8812 C.ar   | 1 UNK | 0.0000 |
| 44 | H15 | -4.1900 | 3.6940  | -1.1799 H      | 1 UNK | 0.0000 |
| 45 | C22 | -1.1867 | 5.6980  | 0.0433 C.ar    | 1 UNK | 0.0000 |
| 46 | H16 | -0.2468 | 3.8424  | 0.5838 H       | 1 UNK | 0.0000 |
| 47 | H17 | -4.1286 | 6.1776  | -1.2840 H      | 1 UNK | 0.0000 |
| 48 | H18 | -0.3535 | 6.3013  | 0.3935 H       | 1 UNK | 0.0000 |
| 49 | C23 | -5.5086 | -0.8982 | 1.0390 C.2     | 1 UNK | 0.0000 |
| 50 | O7  | -4.8906 | -0.6437 | 2.0921 O.2     | 1 UNK | 0.0000 |
| 51 | O8  | -4.9531 | -0.9667 | -0.1346 O.2cor | 1 UNK | 0.0000 |
| 52 | C24 | -7.0040 | -1.1519 | 1.0500 C.3     | 1 UNK | 0.0000 |
| 53 | H19 | -7.2167 | -2.1276 | 0.6027 H       | 1 UNK | 0.0000 |
| 54 | H20 | -7.5064 | -0.3957 | 0.4384 H       | 1 UNK | 0.0000 |
| 55 | H21 | -7.3968 | -1.1187 | 2.0672 H       | 1 UNK | 0.0000 |
| 56 | Cu1 | -3.0434 | -0.5630 | -0.1595 M.Cu   | 1 UNK | 0.0000 |
| 57 | N3  | -2.2387 | 6.3635  | -0.4594 N.ar   | 1 UNK | 0.0000 |

@<TRIPOS>BOND

|    |    |       |
|----|----|-------|
| 1  | 1  | 2 1   |
| 2  | 1  | 3 1   |
| 3  | 1  | 16 1  |
| 4  | 1  | 19 1  |
| 5  | 2  | 4 1   |
| 6  | 2  | 5 1   |
| 7  | 2  | 14 1  |
| 8  | 6  | 7 ar  |
| 9  | 6  | 11 ar |
| 10 | 6  | 16 1  |
| 11 | 7  | 8 ar  |
| 12 | 7  | 12 1  |
| 13 | 8  | 9 ar  |
| 14 | 8  | 17 1  |
| 15 | 9  | 10 ar |
| 16 | 9  | 13 1  |
| 17 | 10 | 11 ar |
| 18 | 10 | 35 1  |
| 19 | 11 | 14 1  |
| 20 | 14 | 15 2  |
| 21 | 15 | 36 1  |
| 22 | 17 | 18 1  |
| 23 | 19 | 20 ar |

|    |    |    |    |
|----|----|----|----|
| 24 | 19 | 21 | ar |
| 25 | 20 | 22 | ar |
| 26 | 20 | 23 | 1  |
| 27 | 21 | 24 | ar |
| 28 | 21 | 25 | 1  |
| 29 | 22 | 26 | ar |
| 30 | 22 | 28 | 1  |
| 31 | 24 | 26 | ar |
| 32 | 24 | 27 | 1  |
| 33 | 26 | 30 | 1  |
| 34 | 28 | 29 | 1  |
| 35 | 30 | 31 | 1  |
| 36 | 31 | 32 | 1  |
| 37 | 31 | 33 | 1  |
| 38 | 31 | 34 | 1  |
| 39 | 36 | 37 | 1  |
| 40 | 36 | 38 | am |
| 41 | 38 | 39 | 2  |
| 42 | 38 | 40 | 1  |
| 43 | 40 | 41 | ar |
| 44 | 40 | 42 | ar |
| 45 | 41 | 43 | ar |
| 46 | 41 | 44 | 1  |
| 47 | 42 | 45 | ar |
| 48 | 42 | 46 | 1  |
| 49 | 43 | 47 | 1  |
| 50 | 43 | 57 | ar |
| 51 | 45 | 48 | 1  |
| 52 | 45 | 57 | ar |
| 53 | 49 | 50 | 2  |
| 54 | 49 | 51 | 2  |
| 55 | 49 | 52 | 1  |
| 56 | 52 | 53 | 1  |
| 57 | 52 | 54 | 1  |
| 58 | 52 | 55 | 1  |
| 59 | 56 | 51 | 1  |
| 60 | 56 | 35 | 1  |
| 61 | 56 | 15 | 1  |
| 62 | 56 | 39 | 1  |

@<TRIPOS>SUBSTRUCTURE

|       |           |     |     |        |
|-------|-----------|-----|-----|--------|
| 1 UNK | 1 RESIDUE | 4 A | UNK | 0 ROOT |
|-------|-----------|-----|-----|--------|

---

Table S5.8.  $[\text{Cu}((R)\text{-L}^2\text{H}_2^{\text{am}})(\text{H}_2\text{O})]^+$  ( $\text{CuC}_{22}\text{N}_3\text{H}_{20}\text{O}_7^+$ )

|                                             |                |
|---------------------------------------------|----------------|
| Electronic Energy, BS1 (a.u.)               | -1738.57510149 |
| Thermal and entropic correction, BS1 (a.u.) | 0.337744       |

@<TRIPOS>MOLECULE

CuC22N3H20O7  
 53 58 1 0 0  
 CuHIN\_wat  
 NO\_CHARGES

@<TRIPOS>ATOM

|    |     |         |         |                |       |        |
|----|-----|---------|---------|----------------|-------|--------|
| 1  | C1  | 1.9869  | 0.7671  | -0.5370 C.3    | 1 UNK | 0.0000 |
| 2  | C2  | 0.8259  | -0.0165 | 0.0655 C.3     | 1 UNK | 0.0000 |
| 3  | H1  | 1.7703  | 0.9644  | -1.5945 H      | 1 UNK | 0.0000 |
| 4  | H2  | 1.0518  | -0.2862 | 1.1052 H       | 1 UNK | 0.0000 |
| 5  | H3  | 0.7136  | -0.9427 | -0.5051 H      | 1 UNK | 0.0000 |
| 6  | C3  | 0.9615  | 2.8055  | 0.1304 C.ar    | 1 UNK | 0.0000 |
| 7  | C4  | 1.1584  | 4.1641  | 0.2745 C.ar    | 1 UNK | 0.0000 |
| 8  | C5  | 0.0374  | 5.0111  | 0.2823 C.ar    | 1 UNK | 0.0000 |
| 9  | C6  | -1.2482 | 4.5077  | 0.1222 C.ar    | 1 UNK | 0.0000 |
| 10 | C7  | -1.4739 | 3.1251  | -0.0234 C.ar   | 1 UNK | 0.0000 |
| 11 | C8  | -0.3421 | 2.2218  | 0.0065 C.ar    | 1 UNK | 0.0000 |
| 12 | H4  | 2.1601  | 4.5653  | 0.3662 H       | 1 UNK | 0.0000 |
| 13 | H5  | -2.1043 | 5.1746  | 0.1057 H       | 1 UNK | 0.0000 |
| 14 | C9  | -0.4464 | 0.7929  | 0.0298 C.2     | 1 UNK | 0.0000 |
| 15 | N1  | -1.6196 | 0.1999  | 0.0645 N.pl3   | 1 UNK | 0.0000 |
| 16 | O1  | 2.0948  | 2.0404  | 0.1400 O.3     | 1 UNK | 0.0000 |
| 17 | O2  | 0.2841  | 6.3420  | 0.4327 O.3     | 1 UNK | 0.0000 |
| 18 | H6  | -0.5522 | 6.8338  | 0.4179 H       | 1 UNK | 0.0000 |
| 19 | C10 | 3.3048  | 0.0494  | -0.4113 C.ar   | 1 UNK | 0.0000 |
| 20 | C11 | 3.9267  | -0.0714 | 0.8417 C.ar    | 1 UNK | 0.0000 |
| 21 | C12 | 3.8930  | -0.5381 | -1.5303 C.ar   | 1 UNK | 0.0000 |
| 22 | C13 | 5.1213  | -0.7669 | 0.9637 C.ar    | 1 UNK | 0.0000 |
| 23 | H7  | 3.4921  | 0.3831  | 1.7261 H       | 1 UNK | 0.0000 |
| 24 | C14 | 5.0916  | -1.2540 | -1.4138 C.ar   | 1 UNK | 0.0000 |
| 25 | H8  | 3.4207  | -0.4444 | -2.5035 H      | 1 UNK | 0.0000 |
| 26 | C15 | 5.7091  | -1.3713 | -0.1708 C.ar   | 1 UNK | 0.0000 |
| 27 | H9  | 5.5352  | -1.7066 | -2.2923 H      | 1 UNK | 0.0000 |
| 28 | O3  | 5.7237  | -0.8636 | 2.1943 O.3     | 1 UNK | 0.0000 |
| 29 | H10 | 6.5482  | -1.3650 | 2.0849 H       | 1 UNK | 0.0000 |
| 30 | O4  | 6.8804  | -2.0350 | 0.0869 O.3     | 1 UNK | 0.0000 |
| 31 | C16 | 7.5468  | -2.6711 | -1.0087 C.3    | 1 UNK | 0.0000 |
| 32 | H11 | 7.8357  | -1.9402 | -1.7723 H      | 1 UNK | 0.0000 |
| 33 | H12 | 8.4407  | -3.1326 | -0.5876 H      | 1 UNK | 0.0000 |
| 34 | H13 | 6.9135  | -3.4428 | -1.4607 H      | 1 UNK | 0.0000 |
| 35 | O5  | -2.7229 | 2.7441  | -0.1857 O.2cor | 1 UNK | 0.0000 |
| 36 | N2  | -1.6997 | -1.1770 | 0.1527 N.am    | 1 UNK | 0.0000 |
| 37 | H14 | -0.9093 | -1.7183 | 0.4862 H       | 1 UNK | 0.0000 |
| 38 | C17 | -2.9159 | -1.7221 | -0.0058 C.2    | 1 UNK | 0.0000 |
| 39 | O6  | -3.9131 | -0.9837 | -0.2536 O.2cor | 1 UNK | 0.0000 |
| 40 | C18 | -3.0684 | -3.1894 | 0.1247 C.ar    | 1 UNK | 0.0000 |
| 41 | C19 | -4.3257 | -3.7007 | 0.4644 C.ar    | 1 UNK | 0.0000 |
| 42 | C20 | -2.0172 | -4.0878 | -0.0938 C.ar   | 1 UNK | 0.0000 |

|    |     |         |         |               |       |        |
|----|-----|---------|---------|---------------|-------|--------|
| 43 | C21 | -4.4692 | -5.0800 | 0.5867 C.ar   | 1 UNK | 0.0000 |
| 44 | H15 | -5.1657 | -3.0384 | 0.6376 H      | 1 UNK | 0.0000 |
| 45 | C22 | -2.2733 | -5.4496 | 0.0513 C.ar   | 1 UNK | 0.0000 |
| 46 | H16 | -1.0280 | -3.7583 | -0.3929 H     | 1 UNK | 0.0000 |
| 47 | H17 | -5.4343 | -5.4994 | 0.8576 H      | 1 UNK | 0.0000 |
| 48 | H18 | -1.4741 | -6.1662 | -0.1176 H     | 1 UNK | 0.0000 |
| 49 | Cu1 | -3.4059 | 0.9700  | -0.2385 M.Cu  | 1 UNK | 0.0000 |
| 50 | N3  | -3.4702 | -5.9556 | 0.3881 N.ar   | 1 UNK | 0.0000 |
| 51 | O7  | -5.3130 | 1.6541  | -0.4643 O.H2O | 1 UNK | 0.0000 |
| 52 | H19 | -5.7981 | 1.0633  | -1.0629 H     | 1 UNK | 0.0000 |
| 53 | H20 | -5.2913 | 2.5141  | -0.9143 H     | 1 UNK | 0.0000 |

@<TRIPOS>BOND

|    |    |       |
|----|----|-------|
| 1  | 1  | 2 1   |
| 2  | 1  | 3 1   |
| 3  | 1  | 16 1  |
| 4  | 1  | 19 1  |
| 5  | 2  | 4 1   |
| 6  | 2  | 5 1   |
| 7  | 2  | 14 1  |
| 8  | 6  | 7 ar  |
| 9  | 6  | 11 ar |
| 10 | 6  | 16 1  |
| 11 | 7  | 8 ar  |
| 12 | 7  | 12 1  |
| 13 | 8  | 9 ar  |
| 14 | 8  | 17 1  |
| 15 | 9  | 10 ar |
| 16 | 9  | 13 1  |
| 17 | 10 | 11 ar |
| 18 | 10 | 35 1  |
| 19 | 11 | 14 1  |
| 20 | 14 | 15 2  |
| 21 | 15 | 36 1  |
| 22 | 17 | 18 1  |
| 23 | 19 | 20 ar |
| 24 | 19 | 21 ar |
| 25 | 20 | 22 ar |
| 26 | 20 | 23 1  |
| 27 | 21 | 24 ar |
| 28 | 21 | 25 1  |
| 29 | 22 | 26 ar |
| 30 | 22 | 28 1  |
| 31 | 24 | 26 ar |
| 32 | 24 | 27 1  |
| 33 | 26 | 30 1  |
| 34 | 28 | 29 1  |
| 35 | 30 | 31 1  |
| 36 | 31 | 32 1  |
| 37 | 31 | 33 1  |



```

38  31  34  1
39  36  37  1
40  36  38  am
41  38  39  2
42  38  40  1
43  40  41  ar
44  40  42  ar
45  41  43  ar
46  41  44  1
47  42  45  ar
48  42  46  1
49  43  47  1
50  43  50  ar
51  45  48  1
52  45  50  ar
53  51  52  1
54  51  53  1
55  49  51  1
56  49  35  1
57  49  15  1
58  49  39  1

```

@<TRIPOS>SUBSTRUCTURE

```

1 UNK      1 RESIDUE      4 A      UNK      0 ROOT

```

---

Table S5.9. [Cu((R)-L<sup>3</sup>H<sub>2</sub>-κS<sup>am</sup>)(AcO)] (CuHTSC; CuC<sub>19</sub>N<sub>3</sub>H<sub>19</sub>SO<sub>7</sub>)

Electronic Energy, BS1 (a.u.) -2022.01285334

Thermal and entropic correction, BS1 (a.u.) 0.305947

@<TRIPOS>MOLECULE

CuC<sub>19</sub>N<sub>3</sub>H<sub>19</sub>SO<sub>7</sub>

50 54 1 0 0

CuHTSC

NO\_CHARGES

@<TRIPOS>ATOM

|   |    |         |         |         |      |       |        |
|---|----|---------|---------|---------|------|-------|--------|
| 1 | C1 | -1.9790 | 0.4760  | 0.4765  | C.3  | 1 UNK | 0.0000 |
| 2 | C2 | -1.1524 | -0.4620 | -0.3961 | C.3  | 1 UNK | 0.0000 |
| 3 | H1 | -1.5826 | 0.4496  | 1.4998  | H    | 1 UNK | 0.0000 |
| 4 | H2 | -1.5704 | -0.4920 | -1.4108 | H    | 1 UNK | 0.0000 |
| 5 | H3 | -1.2293 | -1.4662 | 0.0282  | H    | 1 UNK | 0.0000 |
| 6 | C3 | -0.5636 | 2.2790  | -0.1644 | C.ar | 1 UNK | 0.0000 |

|    |     |         |         |         |        |   |     |        |
|----|-----|---------|---------|---------|--------|---|-----|--------|
| 7  | C4  | -0.4307 | 3.6541  | -0.1796 | C.ar   | 1 | UNK | 0.0000 |
| 8  | C5  | 0.8495  | 4.2077  | -0.3414 | C.ar   | 1 | UNK | 0.0000 |
| 9  | C6  | 1.9716  | 3.4000  | -0.4667 | C.ar   | 1 | UNK | 0.0000 |
| 10 | C7  | 1.8599  | 1.9929  | -0.4485 | C.ar   | 1 | UNK | 0.0000 |
| 11 | C8  | 0.5505  | 1.3900  | -0.3136 | C.ar   | 1 | UNK | 0.0000 |
| 12 | H4  | -1.2999 | 4.2878  | -0.0541 | H      | 1 | UNK | 0.0000 |
| 13 | H5  | 2.9598  | 3.8365  | -0.5733 | H      | 1 | UNK | 0.0000 |
| 14 | C9  | 0.2906  | -0.0164 | -0.4553 | C.2    | 1 | UNK | 0.0000 |
| 15 | N1  | 1.2534  | -0.8929 | -0.6698 | N.pl3  | 1 | UNK | 0.0000 |
| 16 | O1  | -1.8453 | 1.8242  | -0.0201 | O.3    | 1 | UNK | 0.0000 |
| 17 | O2  | 0.9248  | 5.5702  | -0.3444 | O.3    | 1 | UNK | 0.0000 |
| 18 | H6  | 1.8504  | 5.8431  | -0.4403 | H      | 1 | UNK | 0.0000 |
| 19 | C10 | -3.4441 | 0.1238  | 0.4862  | C.ar   | 1 | UNK | 0.0000 |
| 20 | C11 | -4.2305 | 0.3562  | -0.6534 | C.ar   | 1 | UNK | 0.0000 |
| 21 | C12 | -4.0194 | -0.4705 | 1.6082  | C.ar   | 1 | UNK | 0.0000 |
| 22 | C13 | -5.5718 | 0.0007  | -0.6605 | C.ar   | 1 | UNK | 0.0000 |
| 23 | H7  | -3.8074 | 0.8230  | -1.5369 | H      | 1 | UNK | 0.0000 |
| 24 | C14 | -5.3703 | -0.8426 | 1.6059  | C.ar   | 1 | UNK | 0.0000 |
| 25 | H8  | -3.4188 | -0.6495 | 2.4950  | H      | 1 | UNK | 0.0000 |
| 26 | C15 | -6.1502 | -0.6081 | 0.4759  | C.ar   | 1 | UNK | 0.0000 |
| 27 | H9  | -5.8021 | -1.3035 | 2.4862  | H      | 1 | UNK | 0.0000 |
| 28 | O3  | -6.3299 | 0.2436  | -1.7801 | O.3    | 1 | UNK | 0.0000 |
| 29 | H10 | -7.2303 | -0.0752 | -1.6047 | H      | 1 | UNK | 0.0000 |
| 30 | O4  | -7.4798 | -0.9122 | 0.3362  | O.3    | 1 | UNK | 0.0000 |
| 31 | C16 | -8.1452 | -1.5383 | 1.4381  | C.3    | 1 | UNK | 0.0000 |
| 32 | H11 | -8.1309 | -0.8942 | 2.3246  | H      | 1 | UNK | 0.0000 |
| 33 | H12 | -9.1755 | -1.6936 | 1.1162  | H      | 1 | UNK | 0.0000 |
| 34 | H13 | -7.6858 | -2.5038 | 1.6784  | H      | 1 | UNK | 0.0000 |
| 35 | O5  | 2.9668  | 1.3041  | -0.5718 | O.2cor | 1 | UNK | 0.0000 |
| 36 | N2  | 0.8712  | -2.2007 | -0.9402 | N.pl3  | 1 | UNK | 0.0000 |
| 37 | H14 | -0.0128 | -2.3571 | -1.4159 | H      | 1 | UNK | 0.0000 |
| 38 | C17 | 1.7498  | -3.2152 | -0.8511 | C.2    | 1 | UNK | 0.0000 |
| 39 | C18 | 5.3134  | -0.1827 | 1.4012  | C.2    | 1 | UNK | 0.0000 |
| 40 | O6  | 4.4235  | -0.1480 | 2.2752  | O.2    | 1 | UNK | 0.0000 |
| 41 | O7  | 5.0898  | -0.3731 | 0.1362  | O.2cor | 1 | UNK | 0.0000 |
| 42 | C19 | 6.7753  | -0.0077 | 1.7687  | C.3    | 1 | UNK | 0.0000 |
| 43 | H15 | 7.2034  | 0.8231  | 1.1995  | H      | 1 | UNK | 0.0000 |
| 44 | H16 | 7.3301  | -0.9111 | 1.4956  | H      | 1 | UNK | 0.0000 |
| 45 | H17 | 6.8879  | 0.1810  | 2.8372  | H      | 1 | UNK | 0.0000 |
| 46 | Cu1 | 3.1954  | -0.6024 | -0.3155 | M.Cu   | 1 | UNK | 0.0000 |
| 47 | N3  | 1.3214  | -4.4278 | -1.2054 | N.pl3  | 1 | UNK | 0.0000 |
| 48 | H18 | 0.3595  | -4.5924 | -1.4784 | H      | 1 | UNK | 0.0000 |
| 49 | H19 | 1.9465  | -5.2190 | -1.1493 | H      | 1 | UNK | 0.0000 |
| 50 | S1  | 3.3624  | -2.9536 | -0.3043 | S.a    | 1 | UNK | 0.0000 |

@<TRIPOS>BOND

|    |   |    |    |
|----|---|----|----|
| 1  | 1 | 2  | 1  |
| 2  | 1 | 3  | 1  |
| 3  | 1 | 16 | 1  |
| 4  | 1 | 19 | 1  |
| 5  | 2 | 4  | 1  |
| 6  | 2 | 5  | 1  |
| 7  | 2 | 14 | 1  |
| 8  | 6 | 7  | ar |
| 9  | 6 | 11 | ar |
| 10 | 6 | 16 | 1  |
| 11 | 7 | 8  | ar |
| 12 | 7 | 12 | 1  |

|    |    |    |    |
|----|----|----|----|
| 13 | 8  | 9  | ar |
| 14 | 8  | 17 | 1  |
| 15 | 9  | 10 | ar |
| 16 | 9  | 13 | 1  |
| 17 | 10 | 11 | ar |
| 18 | 10 | 35 | 1  |
| 19 | 11 | 14 | 1  |
| 20 | 14 | 15 | 2  |
| 21 | 15 | 36 | 2  |
| 22 | 17 | 18 | 1  |
| 23 | 19 | 20 | ar |
| 24 | 19 | 21 | ar |
| 25 | 20 | 22 | ar |
| 26 | 20 | 23 | 1  |
| 27 | 21 | 24 | ar |
| 28 | 21 | 25 | 1  |
| 29 | 22 | 26 | ar |
| 30 | 22 | 28 | 1  |
| 31 | 24 | 26 | ar |
| 32 | 24 | 27 | 1  |
| 33 | 26 | 30 | 1  |
| 34 | 28 | 29 | 1  |
| 35 | 30 | 31 | 1  |
| 36 | 31 | 32 | 1  |
| 37 | 31 | 33 | 1  |
| 38 | 31 | 34 | 1  |
| 39 | 36 | 37 | 1  |
| 40 | 36 | 38 | 2  |
| 41 | 38 | 47 | 2  |
| 42 | 38 | 50 | 2  |
| 43 | 39 | 40 | 2  |
| 44 | 39 | 41 | 2  |
| 45 | 39 | 42 | 1  |
| 46 | 42 | 43 | 1  |
| 47 | 42 | 44 | 1  |
| 48 | 42 | 45 | 1  |
| 49 | 47 | 48 | 1  |
| 50 | 47 | 49 | 1  |
| 51 | 46 | 35 | 1  |
| 52 | 46 | 15 | 1  |
| 53 | 46 | 41 | 1  |
| 54 | 46 | 50 | 1  |

@<TRIPOS>SUBSTRUCTURE

|       |           |     |     |        |
|-------|-----------|-----|-----|--------|
| 1 UNK | 1 RESIDUE | 4 A | UNK | 0 ROOT |
|-------|-----------|-----|-----|--------|

---

Table S5.10.  $[\text{Cu}((R)\text{-L}^3\text{H}_2\text{-kS}^{\text{am}})(\text{H}_2\text{O})]^+$  ( $\text{CuC}_{17}\text{N}_3\text{H}_{18}\text{SO}_6^+$ )

|                                             |                |
|---------------------------------------------|----------------|
| Electronic Energy, BS1 (a.u.)               | -1869.80106706 |
| Thermal and entropic correction, BS1 (a.u.) | 0.287400       |

@<TRIPOS>MOLECULE

CuC17N3H18SO6

46 50 1 0 0

CuHTSC\_wat

NO\_CHARGES

@<TRIPOS>ATOM

|    |     |         |         |         |        |   |     |        |
|----|-----|---------|---------|---------|--------|---|-----|--------|
| 1  | C1  | 1.5402  | 0.4993  | -0.5857 | C.3    | 1 | UNK | 0.0000 |
| 2  | C2  | 0.6394  | -0.4733 | 0.1666  | C.3    | 1 | UNK | 0.0000 |
| 3  | H1  | 1.2525  | 0.5065  | -1.6446 | H      | 1 | UNK | 0.0000 |
| 4  | H2  | 0.9729  | -0.5590 | 1.2092  | H      | 1 | UNK | 0.0000 |
| 5  | H3  | 0.7465  | -1.4559 | -0.3004 | H      | 1 | UNK | 0.0000 |
| 6  | C3  | 0.0564  | 2.2758  | -0.0275 | C.ar   | 1 | UNK | 0.0000 |
| 7  | C4  | -0.0895 | 3.6488  | 0.0021  | C.ar   | 1 | UNK | 0.0000 |
| 8  | C5  | -1.3832 | 4.1911  | 0.0633  | C.ar   | 1 | UNK | 0.0000 |
| 9  | C6  | -2.5065 | 3.3736  | 0.0752  | C.ar   | 1 | UNK | 0.0000 |
| 10 | C7  | -2.3800 | 1.9702  | 0.0437  | C.ar   | 1 | UNK | 0.0000 |
| 11 | C8  | -1.0609 | 1.3778  | 0.0074  | C.ar   | 1 | UNK | 0.0000 |
| 12 | H4  | 0.7819  | 4.2909  | -0.0310 | H      | 1 | UNK | 0.0000 |
| 13 | H5  | -3.5035 | 3.8013  | 0.1054  | H      | 1 | UNK | 0.0000 |
| 14 | C9  | -0.8027 | -0.0272 | 0.1394  | C.2    | 1 | UNK | 0.0000 |
| 15 | N1  | -1.7710 | -0.9121 | 0.2862  | N.pl.3 | 1 | UNK | 0.0000 |
| 16 | O1  | 1.3475  | 1.8303  | -0.0612 | O.3    | 1 | UNK | 0.0000 |
| 17 | O2  | -1.4686 | 5.5510  | 0.0896  | O.3    | 1 | UNK | 0.0000 |
| 18 | H6  | -2.4001 | 5.8194  | 0.1176  | H      | 1 | UNK | 0.0000 |
| 19 | C10 | 3.0001  | 0.1508  | -0.4516 | C.ar   | 1 | UNK | 0.0000 |
| 20 | C11 | 3.6579  | 0.3467  | 0.7733  | C.ar   | 1 | UNK | 0.0000 |
| 21 | C12 | 3.6937  | -0.4112 | -1.5220 | C.ar   | 1 | UNK | 0.0000 |
| 22 | C13 | 4.9906  | -0.0121 | 0.9157  | C.ar   | 1 | UNK | 0.0000 |
| 23 | H7  | 3.1410  | 0.7876  | 1.6195  | H      | 1 | UNK | 0.0000 |
| 24 | C14 | 5.0364  | -0.7875 | -1.3837 | C.ar   | 1 | UNK | 0.0000 |
| 25 | H8  | 3.1922  | -0.5626 | -2.4732 | H      | 1 | UNK | 0.0000 |
| 26 | C15 | 5.6889  | -0.5895 | -0.1690 | C.ar   | 1 | UNK | 0.0000 |
| 27 | H9  | 5.5616  | -1.2247 | -2.2244 | H      | 1 | UNK | 0.0000 |
| 28 | O3  | 5.6207  | 0.1952  | 2.1187  | O.3    | 1 | UNK | 0.0000 |
| 29 | H10 | 6.5385  | -0.1098 | 2.0319  | H      | 1 | UNK | 0.0000 |
| 30 | O4  | 6.9950  | -0.9033 | 0.1044  | O.3    | 1 | UNK | 0.0000 |
| 31 | C16 | 7.7758  | -1.4968 | -0.9379 | C.3    | 1 | UNK | 0.0000 |
| 32 | H11 | 7.8549  | -0.8267 | -1.8013 | H      | 1 | UNK | 0.0000 |
| 33 | H12 | 8.7661  | -1.6627 | -0.5122 | H      | 1 | UNK | 0.0000 |
| 34 | H13 | 7.3471  | -2.4544 | -1.2545 | H      | 1 | UNK | 0.0000 |
| 35 | O5  | -3.4926 | 1.2731  | 0.0601  | O.2cor | 1 | UNK | 0.0000 |
| 36 | N2  | -1.4033 | -2.2241 | 0.5552  | N.pl3  | 1 | UNK | 0.0000 |
| 37 | H14 | -0.5457 | -2.3884 | 1.0766  | H      | 1 | UNK | 0.0000 |
| 38 | C17 | -2.2774 | -3.2334 | 0.4042  | C.2    | 1 | UNK | 0.0000 |
| 39 | Cu1 | -3.6880 | -0.6209 | -0.1075 | M.Cu   | 1 | UNK | 0.0000 |
| 40 | N3  | -1.8781 | -4.4546 | 0.7552  | N.pl3  | 1 | UNK | 0.0000 |

|    |     |         |         |               |       |        |
|----|-----|---------|---------|---------------|-------|--------|
| 41 | H15 | -0.9346 | -4.6303 | 1.0815 H      | 1 UNK | 0.0000 |
| 42 | H16 | -2.5087 | -5.2387 | 0.6657 H      | 1 UNK | 0.0000 |
| 43 | S1  | -3.8618 | -2.9585 | -0.2254 S.a   | 1 UNK | 0.0000 |
| 44 | O6  | -5.6911 | -0.3250 | -0.5158 O.H2O | 1 UNK | 0.0000 |
| 45 | H17 | -6.2670 | -0.9860 | -0.0996 H     | 1 UNK | 0.0000 |
| 46 | H18 | -5.8507 | -0.4162 | -1.4696 H     | 1 UNK | 0.0000 |

@<TRIPOS>BOND

|    |    |       |
|----|----|-------|
| 1  | 1  | 2 1   |
| 2  | 1  | 3 1   |
| 3  | 1  | 16 1  |
| 4  | 1  | 19 1  |
| 5  | 2  | 4 1   |
| 6  | 2  | 5 1   |
| 7  | 2  | 14 1  |
| 8  | 6  | 7 ar  |
| 9  | 6  | 11 ar |
| 10 | 6  | 16 1  |
| 11 | 7  | 8 ar  |
| 12 | 7  | 12 1  |
| 13 | 8  | 9 ar  |
| 14 | 8  | 17 1  |
| 15 | 9  | 10 ar |
| 16 | 9  | 13 1  |
| 17 | 10 | 11 ar |
| 18 | 10 | 35 1  |
| 19 | 11 | 14 1  |
| 20 | 14 | 15 2  |
| 21 | 15 | 36 2  |
| 22 | 17 | 18 1  |
| 23 | 19 | 20 ar |
| 24 | 19 | 21 ar |
| 25 | 20 | 22 ar |
| 26 | 20 | 23 1  |
| 27 | 21 | 24 ar |
| 28 | 21 | 25 1  |
| 29 | 22 | 26 ar |
| 30 | 22 | 28 1  |
| 31 | 24 | 26 ar |
| 32 | 24 | 27 1  |
| 33 | 26 | 30 1  |
| 34 | 28 | 29 1  |
| 35 | 30 | 31 1  |
| 36 | 31 | 32 1  |
| 37 | 31 | 33 1  |
| 38 | 31 | 34 1  |
| 39 | 36 | 37 1  |
| 40 | 36 | 38 2  |
| 41 | 38 | 40 2  |
| 42 | 38 | 43 2  |

```
0  ROOT
```

|    |     |         |        |              |       |        |
|----|-----|---------|--------|--------------|-------|--------|
| 19 | C17 | 1.1180  | 4.8860 | -0.4700 C.ar | 1 UNK | 0.0000 |
| 20 | C18 | 2.3090  | 4.8990 | 0.2650 C.ar  | 1 UNK | 0.0000 |
| 21 | N2  | 2.3190  | 5.3070 | 1.5670 N.pl3 | 1 UNK | 0.0000 |
| 22 | C19 | 3.6210  | 5.2150 | 2.2580 C.3   | 1 UNK | 0.0000 |
| 23 | H1  | -0.6140 | 4.5500 | -6.3150 H    | 1 UNK | 0.0000 |
| 24 | H2  | -2.6100 | 4.6600 | -7.7440 H    | 1 UNK | 0.0000 |
| 25 | H3  | -4.8580 | 4.9500 | -6.7060 H    | 1 UNK | 0.0000 |
| 26 | H4  | -5.0910 | 4.9950 | -4.2700 H    | 1 UNK | 0.0000 |
| 27 | H5  | -4.9790 | 4.3900 | -2.1530 H    | 1 UNK | 0.0000 |
| 28 | H6  | -3.9360 | 4.0720 | -0.7890 H    | 1 UNK | 0.0000 |
| 29 | H7  | -4.4010 | 5.7470 | -1.1760 H    | 1 UNK | 0.0000 |
| 30 | H8  | -2.2180 | 5.2390 | -0.0330 H    | 1 UNK | 0.0000 |
| 31 | H9  | 2.1600  | 6.8170 | 3.7770 H     | 1 UNK | 0.0000 |
| 32 | H10 | 0.1860  | 7.0710 | 5.1480 H     | 1 UNK | 0.0000 |
| 33 | H11 | -2.0210 | 6.3820 | 4.2650 H     | 1 UNK | 0.0000 |
| 34 | H12 | -2.2630 | 5.7840 | 1.9050 H     | 1 UNK | 0.0000 |
| 35 | H13 | 1.2240  | 4.5740 | -1.4880 H    | 1 UNK | 0.0000 |
| 36 | H14 | 3.2520  | 4.6170 | -0.1620 H    | 1 UNK | 0.0000 |
| 37 | H15 | 3.5650  | 5.3630 | 3.3290 H     | 1 UNK | 0.0000 |
| 38 | H16 | 4.1460  | 6.0120 | 1.7960 H     | 1 UNK | 0.0000 |
| 39 | H17 | 4.1027  | 4.2636 | 2.0323 H     | 1 UNK | 0.0000 |

@<TRIPOS>BOND

|    |    |       |
|----|----|-------|
| 1  | 1  | 2 ar  |
| 2  | 1  | 10 ar |
| 3  | 1  | 23 1  |
| 4  | 2  | 3 ar  |
| 5  | 2  | 24 1  |
| 6  | 3  | 4 ar  |
| 7  | 3  | 25 1  |
| 8  | 4  | 11 ar |
| 9  | 4  | 26 1  |
| 10 | 5  | 6 1   |
| 11 | 5  | 7 ar  |
| 12 | 5  | 11 ar |
| 13 | 6  | 27 1  |
| 14 | 6  | 28 1  |
| 15 | 6  | 29 1  |
| 16 | 7  | 8 1   |
| 17 | 7  | 9 ar  |
| 18 | 8  | 18 1  |
| 19 | 8  | 30 1  |
| 20 | 9  | 10 ar |
| 21 | 10 | 11 ar |
| 22 | 12 | 13 ar |
| 23 | 12 | 17 ar |
| 24 | 12 | 21 ar |
| 25 | 13 | 14 ar |
| 26 | 13 | 31 1  |
| 27 | 14 | 15 ar |

```

28  14  32  1
29  15  16 ar
30  15  33  1
31  16  17 ar
32  16  34  1
33  17  18 ar
34  18  19 ar
35  19  20 ar
36  19  35  1
37  20  21 ar
38  20  36  1
39  21  22  1
40  22  37  1
41  22  38  1
42  22  39  1

```

@<TRIPOS>SUBSTRUCTURE

1 UNK

1 RESIDUE

4 A

UNK

0 ROOT

---



## Section S5.2. Docking results

This section contains the tables displaying the whole solutions and clusters for each docking calculation (Tables S5.12–S5.33).

GoldScore, the scoring function used to calculate the fitness score ( $F$ ) in this work, has been already validated for docking with metal complexes as ligands [1, 2]. The polynomial scoring function consists of a sum of four terms (Fitness score ( $F$ ) =  $\alpha S_{\text{hb\_ext}} + \beta S_{\text{vdw\_ext}} + \gamma S_{\text{hb\_int}} + \delta S_{\text{int}}$ ) accounting for hydrogen bonds between ligand and receptor ( $S_{\text{hb\_ext}}$ ), van der Waals interactions between ligand and receptor ( $S_{\text{vdw\_ext}}$ ), intramolecular hydrogen bonds of the ligand ( $S_{\text{hb\_int}}$ ), and a term that summarizes the intramolecular van der Waals forces of the ligand and its torsional strain energy ( $S_{\text{int}}$ ). Each term is weighted by a coefficient:  $\alpha = 1$ ,  $\beta = 1.375$ ,  $\gamma = 1$ , and  $\delta = 1$ .

Table S5.34 shows that, concerning this study, the most important term among the four ones is  $S_{\text{vdw\_ext}}$ . Regardless of its coefficient, which weighted more than the others, it is still the term that significantly contributed the most to the whole  $F$ . This suggest that the docking poses found in this work are dominated by the van der Waals forces between the ligand and receptor, and, more specifically, between the DNA base pairs and the aromatic moieties of the ligands ( $\text{L}^{\text{n}}\text{H}_3$ ) and their copper complexes.

Table S5.12. Best GoldScore solutions for (*R*)- $\text{L}^1\text{H}_3$  with 2K4L (minor groove binding model).

| Cluster <sup>1</sup> | $F_{\text{max}}$ <sup>2</sup> | $F_{\text{mean}}$ <sup>3</sup> | Population <sup>4</sup> |
|----------------------|-------------------------------|--------------------------------|-------------------------|
| I                    | 76.07                         | -                              | 1                       |
| II                   | 73.26                         | -                              | 1                       |
| III                  | 70.84                         | 67.7                           | 57                      |
| IV                   | 67.17                         | 65.0                           | 32                      |
| V                    | 66.33                         | 64.7                           | 7                       |
| VI                   | 64.93                         | -                              | 1                       |
| VII                  | 63.34                         | -                              | 1                       |

<sup>1</sup> Clustering was performed depending on root-mean-square-deviation (RMSD) with a threshold of 2.5 Å. <sup>2</sup> Highest *Fitness* score in the cluster. <sup>3</sup> Mean *Fitness* score of the cluster.

<sup>4</sup> Number of solutions comprised in each cluster over a total of 100 GA runs.

Table S5.13. Best GoldScore solutions for (S)-L<sup>1</sup>H<sub>3</sub> with PDB ID 2K4L (minor groove binding model).

| Cluster <sup>1</sup> | <i>F</i> <sub>max</sub> <sup>2</sup> | <i>F</i> <sub>mean</sub> <sup>3</sup> | Population <sup>4</sup> |
|----------------------|--------------------------------------|---------------------------------------|-------------------------|
| I                    | 77.72                                | 75.0                                  | 2                       |
| II                   | 77.39                                | 74.0                                  | 5                       |
| III                  | 74.52                                | 71.8                                  | 8                       |
| IV                   | 74.37                                | -                                     | 1                       |
| V                    | 72.32                                | 70.6                                  | 7                       |
| VI                   | 71.22                                | 67.1                                  | 52                      |
| VII                  | 71.17                                | 70.1                                  | 3                       |
| VIII                 | 70.89                                | 67.8                                  | 6                       |
| IX                   | 69.24                                | -                                     | 1                       |
| X                    | 68.57                                | 66.3                                  | 10                      |
| XI                   | 66.85                                | -                                     | 1                       |
| XII                  | 64.36                                | -                                     | 1                       |
| XIII                 | 64.16                                | 64.2                                  | 2                       |
| XIV                  | 61.09                                | -                                     | 1                       |

<sup>1</sup> Clustering was performed depending on root-mean-square-deviation (RMSD) with a threshold of 2.5 Å. <sup>2</sup> Highest *Fitness* score in the cluster. <sup>3</sup> Mean *Fitness* score of the cluster.

<sup>4</sup> Number of solutions comprised in each cluster over a total of 100 GA runs.

Table S5.14. Best GoldScore solutions for (R)-L<sup>1</sup>H<sub>3</sub> with PDB ID 108D (intercalation binding model).

| Cluster <sup>1</sup> | <i>F</i> <sub>max</sub> <sup>2</sup> | <i>F</i> <sub>mean</sub> <sup>3</sup> | Population <sup>4</sup> |
|----------------------|--------------------------------------|---------------------------------------|-------------------------|
| I                    | 87.98                                | 86.3                                  | 51                      |
| II                   | 84.31                                | 82.1                                  | 5                       |
| III                  | 82.87                                | 81.4                                  | 17                      |
| IV                   | 80.55                                | 9.3                                   | 24                      |
| V                    | 77.73                                | -                                     | 1                       |
| VI                   | 77.18                                | -                                     | 1                       |
| VII                  | 76.64                                | -                                     | 1                       |

<sup>1</sup> Clustering was performed depending on root-mean-square-deviation (RMSD) with a threshold of 2.5 Å. <sup>2</sup> Highest *Fitness* score in the cluster. <sup>3</sup> Mean *Fitness* score of the cluster.

<sup>4</sup> Number of solutions comprised in each cluster over a total of 100 GA runs.

Table S5.15. Best GoldScore solutions for (S)-L<sup>1</sup>H<sub>3</sub> with PDB ID 108D (intercalation binding model).

| <b>Cluster</b> <sup>1</sup> | <b><i>F</i><sub>max</sub></b> <sup>2</sup> | <b><i>F</i><sub>mean</sub></b> <sup>3</sup> | <b>Population</b> <sup>4</sup> |
|-----------------------------|--------------------------------------------|---------------------------------------------|--------------------------------|
| I                           | 86.95                                      | 85.4                                        | 40                             |
| II                          | 86.03                                      | 84.8                                        | 17                             |
| III                         | 84.39                                      | 83.0                                        | 12                             |
| IV                          | 81.87                                      | 81.1                                        | 8                              |
| V                           | 81.29                                      | 80.6                                        | 5                              |
| VI                          | 80.78                                      | 80.1                                        | 15                             |
| VII                         | 79.02                                      | -                                           | 1                              |
| VIII                        | 77.55                                      | 77.4                                        | 2                              |

<sup>1</sup> Clustering was performed depending on root-mean-square-deviation (RMSD) with a threshold of 2.5 Å. <sup>2</sup> Highest *Fitness* score in the cluster. <sup>3</sup> Mean *Fitness* score of the cluster.

<sup>4</sup> Number of solutions comprised in each cluster over a total of 100 GA runs.

Table S5.16. Best GoldScore solutions for [Cu((R)-L<sup>1</sup>H<sub>2</sub><sup>am</sup>)(AcO)] with PDB ID 2K4L (intercalation binding model).

| <b>Cluster</b> <sup>1</sup> | <b><i>F</i><sub>max</sub></b> <sup>2</sup> | <b><i>F</i><sub>mean</sub></b> <sup>3</sup> | <b>Population</b> <sup>4</sup> |
|-----------------------------|--------------------------------------------|---------------------------------------------|--------------------------------|
| I                           | 72.83                                      | 69.2                                        | 83                             |
| II                          | 71.04                                      | 69.0                                        | 11                             |
| III                         | 70.25                                      | 69.8                                        | 2                              |
| IV                          | 70.18                                      | 67.8                                        | 4                              |

<sup>1</sup> Clustering was performed depending on root-mean-square-deviation (RMSD) with a threshold of 2.5 Å. <sup>2</sup> Highest *Fitness* score in the cluster. <sup>3</sup> Mean *Fitness* score of the cluster.

<sup>4</sup> Number of solutions comprised in each cluster over a total of 100 GA runs.

Table S5.17. Best GoldScore solutions for [Cu((S)-L<sup>1</sup>H<sub>2</sub><sup>am</sup>)(AcO)] with PDB ID 2K4L (intercalation binding model).

| Cluster <sup>1</sup> | <i>F</i> <sub>max</sub> <sup>2</sup> | <i>F</i> <sub>mean</sub> <sup>3</sup> | Population <sup>4</sup> |
|----------------------|--------------------------------------|---------------------------------------|-------------------------|
| I                    | 75.86                                | 73.1                                  | 88                      |
| II                   | 75.72                                | 73.9                                  | 3                       |
| III                  | 75.67                                | 69.0                                  | 4                       |
| IV                   | 67.88                                | 66.4                                  | 2                       |
| V                    | 67.56                                | -                                     | 1                       |
| VI                   | 65.93                                | -                                     | 1                       |
| VII                  | 62.96                                | -                                     | 1                       |

<sup>1</sup> Clustering was performed depending on root-mean-square-deviation (RMSD) with a threshold of 2.5 Å. <sup>2</sup> Highest *Fitness* score in the cluster. <sup>3</sup> Mean *Fitness* score of the cluster.

<sup>4</sup> Number of solutions comprised in each cluster over a total of 100 GA runs.

Table S5.18. Best GoldScore solutions for [Cu((R)-L<sup>1</sup>H<sub>2</sub><sup>am</sup>)(AcO)] with PDB ID 108D (intercalation binding model).

| Cluster <sup>1</sup> | <i>F</i> <sub>max</sub> <sup>2</sup> | <i>F</i> <sub>mean</sub> <sup>3</sup> | Population <sup>4</sup> |
|----------------------|--------------------------------------|---------------------------------------|-------------------------|
| I                    | 92.35                                | 90.2                                  | 83                      |
| II                   | 90.30                                | 88.3                                  | 5                       |
| III                  | 84.89                                | 83.8                                  | 2                       |
| IV                   | 83.96                                | -                                     | 1                       |
| V                    | 81.73                                | 81.4                                  | 3                       |
| VI                   | 81.04                                | -                                     | 1                       |
| VII                  | 78.70                                | -                                     | 1                       |
| VIII                 | 78.46                                |                                       | 1                       |
| IX                   | 78.36                                | 78.3                                  | 2                       |
| X                    | 77.27                                | -                                     | 1                       |

<sup>1</sup> Clustering was performed depending on root-mean-square-deviation (RMSD) with a threshold of 2.5 Å. <sup>2</sup> Highest *Fitness* score in the cluster. <sup>3</sup> Mean *Fitness* score of the cluster.

<sup>4</sup> Number of solutions comprised in each cluster over a total of 100 GA runs.

Table S5.19. Best GoldScore solutions for [Cu((S)-L<sup>1</sup>H<sub>2</sub><sup>am</sup>)(AcO)] with PDB ID 108D (intercalation binding model).

| Cluster <sup>1</sup> | <i>F</i> <sub>max</sub> <sup>2</sup> | <i>F</i> <sub>mean</sub> <sup>3</sup> | Population <sup>4</sup> |
|----------------------|--------------------------------------|---------------------------------------|-------------------------|
| I                    | 88.18                                | 86.0                                  | 10                      |
| II                   | 87.60                                | 86.0                                  | 79                      |
| III                  | 85.95                                | -                                     | 1                       |
| IV                   | 85.56                                | 84.7                                  | 6                       |
| V                    | 85.15                                | -                                     | 1                       |
| VI                   | 85.03                                | 84.9                                  | 2                       |
| VII                  | 83.41                                | -                                     | 1                       |

<sup>1</sup> Clustering was performed depending on root-mean-square-deviation (RMSD) with a threshold of 2.5 Å. <sup>2</sup> Highest *Fitness* score in the cluster. <sup>3</sup> Mean *Fitness* score of the cluster.

<sup>4</sup> Number of solutions comprised in each cluster over a total of 100 GA runs.

Table S5.20. Best GoldScore solutions for [Cu((R)-L<sup>1</sup>H<sub>2</sub><sup>am</sup>)(H<sub>2</sub>O)]<sup>+</sup> with PDB ID 2K4L (intercalation binding model).

| Cluster <sup>1</sup> | <i>F</i> <sub>max</sub> <sup>2</sup> | <i>F</i> <sub>mean</sub> <sup>3</sup> | Population <sup>4</sup> |
|----------------------|--------------------------------------|---------------------------------------|-------------------------|
| I                    | 70.23                                | 67.5                                  | 42                      |
| II                   | 69.05                                | 66.4                                  | 12                      |
| III                  | 68.82                                | 66.9                                  | 43                      |
| IV                   | 65.01                                | 63.3                                  | 3                       |

<sup>1</sup> Clustering was performed depending on root-mean-square-deviation (RMSD) with a threshold of 2.5 Å. <sup>2</sup> Highest *Fitness* score in the cluster. <sup>3</sup> Mean *Fitness* score of the cluster.

<sup>4</sup> Number of solutions comprised in each cluster over a total of 100 GA runs.

Table S5.21. Best GoldScore solutions for [Cu((S)-L<sup>1</sup>H<sub>2</sub><sup>am</sup>)(H<sub>2</sub>O)]<sup>+</sup> with PDB ID 2K4L (intercalation binding model).

| Cluster <sup>1</sup> | <i>F</i> <sub>max</sub> <sup>2</sup> | <i>F</i> <sub>mean</sub> <sup>3</sup> | Population <sup>4</sup> |
|----------------------|--------------------------------------|---------------------------------------|-------------------------|
| I                    | 75.68                                | 74.6                                  | 2                       |
| II                   | 74.30                                | 74.2                                  | 2                       |
| III                  | 71.89                                | 69.2                                  | 89                      |
| IV                   | 70.46                                | 70.0                                  | 2                       |
| V                    | 70.34                                | 68.3                                  | 2                       |
| VI                   | 68.08                                | -                                     | 1                       |
| VII                  | 60.23                                | -                                     | 1                       |
| VIII                 | 59.89                                | -                                     | 1                       |

<sup>1</sup> Clustering was performed depending on root-mean-square-deviation (RMSD) with a threshold of 2.5 Å. <sup>2</sup> Highest *Fitness* score in the cluster. <sup>3</sup> Mean *Fitness* score of the cluster.

<sup>4</sup> Number of solutions comprised in each cluster over a total of 100 GA runs.

Table S5.22. Best GoldScore solutions for [Cu((R)-L<sup>1</sup>H<sub>2</sub><sup>am</sup>)(H<sub>2</sub>O)]<sup>+</sup> with PDB ID 108D (intercalation binding model).

| Cluster <sup>1</sup> | <i>F</i> <sub>max</sub> <sup>2</sup> | <i>F</i> <sub>mean</sub> <sup>3</sup> | Population <sup>4</sup> |
|----------------------|--------------------------------------|---------------------------------------|-------------------------|
| I                    | 89.51                                | 87.5                                  | 94                      |
| II                   | 81.38                                | 81.1                                  | 2                       |
| III                  | 78.26                                | 78.1                                  | 3                       |
| IV                   | 74.80                                | -                                     | 1                       |

<sup>1</sup> Clustering was performed depending on root-mean-square-deviation (RMSD) with a threshold of 2.5 Å. <sup>2</sup> Highest *Fitness* score in the cluster. <sup>3</sup> Mean *Fitness* score of the cluster.

<sup>4</sup> Number of solutions comprised in each cluster over a total of 100 GA runs.

Table S5.23. Best GoldScore solutions for [Cu((S)-L<sup>1</sup>H<sub>2</sub><sup>am</sup>)(H<sub>2</sub>O)]<sup>+</sup> with PDB ID 108D (intercalation binding model).

| Cluster <sup>1</sup> | <i>F</i> <sub>max</sub> <sup>2</sup> | <i>F</i> <sub>mean</sub> <sup>3</sup> | Population <sup>4</sup> |
|----------------------|--------------------------------------|---------------------------------------|-------------------------|
| I                    | 84.53                                | 83.4                                  | 12                      |
| II                   | 84.23                                | 82.8                                  | 86                      |
| III                  | 81.14                                | -                                     | 1                       |
| IV                   | 80.38                                | -                                     | 1                       |

<sup>1</sup> Clustering was performed depending on root-mean-square-deviation (RMSD) with a threshold of 2.5 Å. <sup>2</sup> Highest *Fitness* score in the cluster. <sup>3</sup> Mean *Fitness* score of the cluster.

<sup>4</sup> Number of solutions comprised in each cluster over a total of 100 GA runs.

Table S5.24. Best GoldScore solutions for [Cu((R)-L<sup>2</sup>H<sub>2</sub><sup>am</sup>)(AcO)] with PDB ID 2K4L (intercalation binding model).

| Cluster <sup>1</sup> | <i>F</i> <sub>max</sub> <sup>2</sup> | <i>F</i> <sub>mean</sub> <sup>3</sup> | Population <sup>4</sup> |
|----------------------|--------------------------------------|---------------------------------------|-------------------------|
| I                    | 70.25                                | 68.1                                  | 11                      |
| II                   | 69.69                                | 67.2                                  | 15                      |
| III                  | 69.60                                | 67.7                                  | 73                      |
| IV                   | 65.94                                | -                                     | 1                       |

<sup>1</sup> Clustering was performed depending on root-mean-square-deviation (RMSD) with a threshold of 2.5 Å. <sup>2</sup> Highest *Fitness* score in the cluster. <sup>3</sup> Mean *Fitness* score of the cluster.

<sup>4</sup> Number of solutions comprised in each cluster over a total of 100 GA runs.

Table S5.25. Best GoldScore solutions for [Cu((*R*)-L<sup>2</sup>H<sub>2</sub><sup>am</sup>)(AcO)] with PDB ID 108D (intercalation binding model).

| <b>Cluster</b> <sup>1</sup> | <b><i>F</i><sub>max</sub></b> <sup>2</sup> | <b><i>F</i><sub>mean</sub></b> <sup>3</sup> | <b>Population</b> <sup>4</sup> |
|-----------------------------|--------------------------------------------|---------------------------------------------|--------------------------------|
| I                           | 92.74                                      | 90.2                                        | 85                             |
| II                          | 88.06                                      | 87.1                                        | 6                              |
| III                         | 81.59                                      | 81.2                                        | 5                              |
| IV                          | 79.91                                      | 79.8                                        | 2                              |
| V                           | 78.20                                      | -                                           | 1                              |
| VI                          | 77.60                                      | -                                           | 1                              |

<sup>1</sup> Clustering was performed depending on root-mean-square-deviation (RMSD) with a threshold of 2.5 Å. <sup>2</sup> Highest *Fitness* score in the cluster. <sup>3</sup> Mean *Fitness* score of the cluster.

<sup>4</sup> Number of solutions comprised in each cluster over a total of 100 GA runs.

Table S5.26. Best GoldScore solutions for [Cu((*R*)-L<sup>2</sup>H<sub>2</sub><sup>am</sup>)(H<sub>2</sub>O)]<sup>+</sup> with PDB ID 2K4L (intercalation binding model).

| <b>Cluster</b> <sup>1</sup> | <b><i>F</i><sub>max</sub></b> <sup>2</sup> | <b><i>F</i><sub>mean</sub></b> <sup>3</sup> | <b>Population</b> <sup>4</sup> |
|-----------------------------|--------------------------------------------|---------------------------------------------|--------------------------------|
| I                           | 68.96                                      | 65.7                                        | 25                             |
| II                          | 68.82                                      | 65.1                                        | 42                             |
| III                         | 67.32                                      | 65.3                                        | 31                             |
| IV                          | 67.16                                      | -                                           | 1                              |
| V                           | 61.91                                      | -                                           | 1                              |

<sup>1</sup> Clustering was performed depending on root-mean-square-deviation (RMSD) with a threshold of 2.5 Å. <sup>2</sup> Highest *Fitness* score in the cluster. <sup>3</sup> Mean *Fitness* score of the cluster.

<sup>4</sup> Number of solutions comprised in each cluster over a total of 100 GA runs.



Table S5.27. Best GoldScore solutions for [Cu((*R*)-L<sup>2</sup>H<sub>2</sub><sup>am</sup>)(H<sub>2</sub>O)]<sup>+</sup> with PDB ID 108D (intercalation binding model).

| Cluster <sup>1</sup> | <i>F</i> <sub>max</sub> <sup>2</sup> | <i>F</i> <sub>mean</sub> <sup>3</sup> | Population <sup>4</sup> |
|----------------------|--------------------------------------|---------------------------------------|-------------------------|
| I                    | 89.24                                | 87.7                                  | 89                      |
| II                   | 84.64                                | 81.4                                  | 5                       |
| III                  | 77.16                                | -                                     | 1                       |
| IV                   | 74.62                                | 74.5                                  | 2                       |
| V                    | 74.12                                | -                                     | 1                       |
| VI                   | 73.84                                | -                                     | 1                       |
| VII                  | 72.64                                | -                                     | 1                       |

<sup>1</sup> Clustering was performed depending on root-mean-square-deviation (RMSD) with a threshold of 2.5 Å. <sup>2</sup> Highest *Fitness* score in the cluster. <sup>3</sup> Mean *Fitness* score of the cluster.

<sup>4</sup> Number of solutions comprised in each cluster over a total of 100 GA runs.

Table S5.28. Best GoldScore solutions for [Cu((*R*)-L<sup>3</sup>H<sub>2</sub><sup>am</sup>)(AcO)] with PDB ID 2K4L (intercalation binding model).

| Cluster <sup>1</sup> | <i>F</i> <sub>max</sub> <sup>2</sup> | <i>F</i> <sub>mean</sub> <sup>3</sup> | Population <sup>4</sup> |
|----------------------|--------------------------------------|---------------------------------------|-------------------------|
| I                    | 74.53                                | 70.0                                  | 66                      |
| II                   | 73.97                                | -                                     | 1                       |
| III                  | 70.58                                | 67.1                                  | 4                       |
| IV                   | 68.85                                | 67.1                                  | 22                      |
| V                    | 67.19                                | 66.5                                  | 3                       |
| VI                   | 66.41                                | -                                     | 1                       |
| VII                  | 65.99                                | 65.7                                  | 2                       |
| VIII                 | 58.43                                | -                                     | 1                       |

<sup>1</sup> Clustering was performed depending on root-mean-square-deviation (RMSD) with a threshold of 2.5 Å. <sup>2</sup> Highest *Fitness* score in the cluster. <sup>3</sup> Mean *Fitness* score of the cluster.

<sup>4</sup> Number of solutions comprised in each cluster over a total of 100 GA runs.

Table S5.29. Best GoldScore solutions for [Cu((*R*)-L<sup>3</sup>H<sub>2</sub><sup>am</sup>)(AcO)] with PDB ID 108D (intercalation binding model).

| Cluster <sup>1</sup> | <i>F</i> <sub>max</sub> <sup>2</sup> | <i>F</i> <sub>mean</sub> <sup>3</sup> | Population <sup>4</sup> |
|----------------------|--------------------------------------|---------------------------------------|-------------------------|
| I                    | 83.24                                | 82.5                                  | 2                       |
| II                   | 82.31                                | 79.7                                  | 28                      |
| III                  | 81.46                                | 79.5                                  | 61                      |
| IV                   | 80.46                                | 79.0                                  | 6                       |
| V                    | 79.26                                | -                                     | 1                       |
| VI                   | 78.63                                | -                                     | 1                       |
| VII                  | 74.70                                | -                                     | 1                       |

<sup>1</sup> Clustering was performed depending on root-mean-square-deviation (RMSD) with a threshold of 2.5 Å. <sup>2</sup> Highest *Fitness* score in the cluster. <sup>3</sup> Mean *Fitness* score of the cluster.

<sup>4</sup> Number of solutions comprised in each cluster over a total of 100 GA runs.

Table S5.30. Best GoldScore solutions for [Cu((*R*)-L<sup>3</sup>H<sub>2</sub><sup>am</sup>)(H<sub>2</sub>O)]<sup>+</sup> with PDB ID 2K4L (intercalation binding model).

| Cluster <sup>1</sup> | <i>F</i> <sub>max</sub> <sup>2</sup> | <i>F</i> <sub>mean</sub> <sup>3</sup> | Population <sup>4</sup> |
|----------------------|--------------------------------------|---------------------------------------|-------------------------|
| I                    | 68.63                                | 66.2                                  | 9                       |
| II                   | 66.23                                | 62.5                                  | 17                      |
| III                  | 65.40                                | 62.8                                  | 25                      |
| IV                   | 63.56                                | 61.6                                  | 25                      |
| V                    | 63.45                                | -                                     | 1                       |
| VI                   | 63.00                                | 61.2                                  | 20                      |
| VII                  | 62.40                                | 62.1                                  | 2                       |
| VIII                 | 61.09                                | -                                     | 1                       |

<sup>1</sup> Clustering was performed depending on root-mean-square-deviation (RMSD) with a threshold of 2.5 Å. <sup>2</sup> Highest *Fitness* score in the cluster. <sup>3</sup> Mean *Fitness* score of the cluster.

<sup>4</sup> Number of solutions comprised in each cluster over a total of 100 GA runs.

Table S5.31. Best GoldScore solutions for [Cu((*R*)-L<sup>3</sup>H<sub>2</sub><sup>am</sup>)(H<sub>2</sub>O)]<sup>+</sup> with PDB ID 108D (intercalation binding model).

| <b>Cluster</b> <sup>1</sup> | <b><i>F</i><sub>max</sub></b> <sup>2</sup> | <b><i>F</i><sub>mean</sub></b> <sup>3</sup> | <b>Population</b> <sup>4</sup> |
|-----------------------------|--------------------------------------------|---------------------------------------------|--------------------------------|
| I                           | 75.48                                      | 74.4                                        | 25                             |
| II                          | 75.17                                      | -                                           | 1                              |
| III                         | 74.22                                      | 73.3                                        | 74                             |

<sup>1</sup> Clustering was performed depending on root-mean-square-deviation (RMSD) with a threshold of 2.5 Å. <sup>2</sup> Highest *Fitness* score in the cluster. <sup>3</sup> Mean *Fitness* score of the cluster.

<sup>4</sup> Number of solutions comprised in each cluster over a total of 100 GA runs.

Table S5.32. Best GoldScore solutions for TO with PDB ID 2K4L (intercalation binding model).

| <b>Cluster</b> <sup>1</sup> | <b><i>F</i><sub>max</sub></b> <sup>2</sup> | <b><i>F</i><sub>mean</sub></b> <sup>3</sup> | <b>Population</b> <sup>4</sup> |
|-----------------------------|--------------------------------------------|---------------------------------------------|--------------------------------|
| I                           | 71.42                                      | 69.4                                        | 53                             |
| II                          | 70.23                                      | 67.4                                        | 11                             |
| III                         | 70.04                                      | 68.6                                        | 14                             |
| IV                          | 69.98                                      | 68.0                                        | 8                              |
| V                           | 68.20                                      | 67.3                                        | 4                              |
| VI                          | 67.28                                      | 64.2                                        | 2                              |
| VII                         | 67.11                                      | 65.3                                        | 6                              |
| VIII                        | 63.95                                      | -                                           | 1                              |
| IX                          | 61.69                                      | -                                           | 1                              |

<sup>1</sup> Clustering was performed depending on root-mean-square-deviation (RMSD) with a threshold of 2.5 Å. <sup>2</sup> Highest *Fitness* score in the cluster. <sup>3</sup> Mean *Fitness* score of the cluster.

<sup>4</sup> Number of solutions comprised in each cluster over a total of 100 GA runs.

Table S5.33. Best GoldScore solutions for TO with PDB ID 108D (intercalation binding model).

| <b>Cluster</b> <sup>1</sup> | <b><i>F</i><sub>max</sub></b> <sup>2</sup> | <b><i>F</i><sub>mean</sub></b> <sup>3</sup> | <b>Population</b> <sup>4</sup> |
|-----------------------------|--------------------------------------------|---------------------------------------------|--------------------------------|
| I                           | 88.13                                      | 86.6                                        | 5                              |
| II                          | 87.76                                      | 86.0                                        | 67                             |
| III                         | 87.29                                      | 86.5                                        | 27                             |
| IV                          | 85.85                                      | -                                           | 1                              |

<sup>1</sup> Clustering was performed depending on root-mean-square-deviation (RMSD) with a threshold of 2.5 Å. <sup>2</sup> Highest *Fitness* score in the cluster. <sup>3</sup> Mean *Fitness* score of the cluster.

<sup>4</sup> Number of solutions comprised in each cluster over a total of 100 GA runs.

Table S5.34. *Fitness* score analysis of the best poses for each docking calculation.

| Ligand                                                                                    | Binding mode (PDB ID) | <i>F</i> | <i>S</i> <sub>hb_ext</sub> | <i>S</i> <sub>vdw_ext</sub> <sup>1</sup> | <i>S</i> <sub>hb_int</sub> | <i>S</i> <sub>int</sub> |
|-------------------------------------------------------------------------------------------|-----------------------|----------|----------------------------|------------------------------------------|----------------------------|-------------------------|
| (R)-L <sup>1</sup> H <sub>3</sub> <sup>am</sup>                                           | Groove (2K4L)         | 76.1     | 6.09                       | 79.17                                    | 0.00                       | -9.21                   |
|                                                                                           | Intercalation (108D)  | 88.0     | 0.00                       | 88.29                                    | 0.00                       | -0.31                   |
| (S)-L <sup>1</sup> H <sub>3</sub> <sup>am</sup>                                           | Groove (2K4L)         | 77.7     | 6.30                       | 71.93                                    | 0.00                       | -0.51                   |
|                                                                                           | Intercalation (108D)  | 87.0     | 1.72                       | 89.53                                    | 0.00                       | -4.29                   |
| [Cu((R)-L <sup>1</sup> H <sub>2</sub> <sup>am</sup> )(AcO)]                               | Groove (2K4L)         | 72.8     | 7.13                       | 73.36                                    | 0.00                       | -7.66                   |
|                                                                                           | Intercalation (108D)  | 92.4     | 1.70                       | 90.98                                    | 0.00                       | -0.34                   |
| [Cu((S)-L <sup>1</sup> H <sub>2</sub> <sup>am</sup> )(AcO)]                               | Groove (2K4L)         | 75.9     | 6.60                       | 71.68                                    | 0.00                       | -2.41                   |
|                                                                                           | Intercalation (108D)  | 88.2     | 4.62                       | 86.27                                    | 0.00                       | -2.71                   |
| [Cu((R)-L <sup>1</sup> H <sub>2</sub> <sup>am</sup> )(H <sub>2</sub> O)] <sup>+</sup>     | Groove (2K4L)         | 70.2     | 0.22                       | 72.26                                    | 0.00                       | -2.23                   |
|                                                                                           | Intercalation (108D)  | 89.5     | 0.00                       | 89.69                                    | 0.00                       | -0.18                   |
| [Cu((S)-L <sup>1</sup> H <sub>2</sub> <sup>am</sup> )(H <sub>2</sub> O)] <sup>+</sup>     | Groove (2K4L)         | 75.1     | 2.68                       | 74.53                                    | 0.00                       | -2.15                   |
|                                                                                           | Intercalation (108D)  | 84.5     | 0.00                       | 87.67                                    | 0.00                       | -3.13                   |
| [Cu((R)-L <sup>2</sup> H <sub>2</sub> <sup>am</sup> )(AcO)]                               | Groove (2K4L)         | 70.3     | 0.11                       | 71.97                                    | 0.00                       | -1.82                   |
|                                                                                           | Intercalation (108D)  | 92.7     | 1.35                       | 92.03                                    | 0.00                       | -0.64                   |
| [Cu((R)-L <sup>2</sup> H <sub>2</sub> <sup>am</sup> )(H <sub>2</sub> O)] <sup>+</sup>     | Groove (2K4L)         | 69.0     | 3.50                       | 67.65                                    | 0.00                       | -2.19                   |
|                                                                                           | Intercalation (108D)  | 89.2     | 0.00                       | 89.51                                    | 0.00                       | -0.27                   |
| [Cu((R)-L <sup>3</sup> H <sub>2</sub> -κS <sup>am</sup> )(AcO)]                           | Groove (2K4L)         | 74.5     | 1.75                       | 74.69                                    | 0.00                       | -1.91                   |
|                                                                                           | Intercalation (108D)  | 83.2     | 0.44                       | 83.44                                    | 0.00                       | -0.63                   |
| [Cu((R)-L <sup>3</sup> H <sub>2</sub> -κS <sup>am</sup> )(H <sub>2</sub> O)] <sup>+</sup> | Groove (2K4L)         | 68.6     | 8.80                       | 62.85                                    | 0.00                       | -3.02                   |
|                                                                                           | Intercalation (108D)  | 75.5     | 1.97                       | 79.96                                    | 0.00                       | -6.44                   |
| TO                                                                                        | Groove (2K4L)         | 71.4     | 0.00                       | 73.11                                    | 0.00                       | -1.69                   |
|                                                                                           | Intercalation (108D)  | 88.1     | 0.00                       | 90.94                                    | 0.00                       | -2.81                   |

<sup>1</sup> This term is multiplied by the coefficient  $\beta = 1.375$ .

## Section S6. References

1. Sciortino, G.; Sanna, D.; Ugone, V.; Lledós, A.; Maréchal, J.-D.; Garribba, E., Decoding Surface Interaction of V<sup>IV</sup>O Metallodrug Candidates with Lysozyme. *Inorg. Chem.* **2018**, 57, 4456-4469.
2. Sciortino, G.; Sanna, D.; Ugone, V.; Micera, G.; Lledós, A.; Maréchal, J.-D.; Garribba, E., Elucidation of Binding Site and Chiral Specificity of Oxidovanadium Drugs with Lysozyme through Theoretical Calculations. *Inorg. Chem.* **2017**, 56, 12938-12951.
